1 **SIX1 cooperates with RUNX1 and SMAD4 in cell fate commitment of Müllerian duct epithelium.**

Jumpei Terakawa<sup>1#</sup>, Vanida A. Serna<sup>1</sup>, Devi Nair<sup>1</sup>, Shigeru Sato<sup>2</sup>, Kiyoshi Kawakami<sup>2</sup>, Sally Radovick<sup>3</sup>, Pascal Maire<sup>4</sup> and Takeshi Kurita<sup>1\*</sup>

<sup>1</sup>Department of Cancer Biology and Genetics, The Comprehensive Cancer Center, The Ohio State University, Columbus, Ohio, United States of America

<sup>2</sup>Division of Biology, Center for Molecular Medicine, Jichi Medical University, Shimotsuke, Tochigi, Japan

<sup>3</sup>Department of Pediatrics, Robert Wood Johnson Medical School, The Child Health Institute of NJ, New Brunswick, New Jersey, United States of America

<sup>4</sup> Institut Cochin. INSERM U1016. CNRS UMR 8104. Université Paris Descartes., Paris, France

<sup>#</sup>Current address: Division of Transgenic Animal Science, Advanced Science Research Center, Kanazawa University, Kanazawa, Japan

**Short title:** SIX1 controls epithelial cell fate commitment in the Müllerian duct.

\* Corresponding author

E-mail: [takeshi.kurita@osumc.edu](mailto:takeshi.kurita@osumc.edu)

### 3 **Abstract**

4 During female mammal reproductive tract development, epithelial cells of the lower Müllerian duct are  
5 committed to become stratified squamous epithelium of vagina and ectocervix, when the expression  
6 of  $\Delta$ Np63 transcription factor is induced by mesenchymal cells. The absence of  $\Delta$ Np63 expression  
7 leads to adenosis, the putative precursor of vaginal adenocarcinoma. Our previous studies with  
8 genetically engineered mouse models have established that fibroblast growth factor (FGF)/mitogen-  
9 activated protein kinase (MAPK), bone morphogenetic protein (BMP)/SMAD, and activin A/run-  
10 related transcription factor 1 (RUNX1) signaling pathways are independently required for  $\Delta$ Np63  
11 expression in Müllerian duct epithelium (MDE). Here we report that sine oculis homeobox homolog 1  
12 (SIX1) plays a critical role in the activation of  $\Delta$ Np63 locus in MDE as a downstream transcription  
13 factor of mesenchymal signals. In mouse developing reproductive tract, SIX1 expression was  
14 restricted to MDE of the future cervix and vagina. SIX1 expression was totally absent in SMAD4 null  
15 MDE and was reduced in RUNX1 null and FGFR2 null MDE, indicating that SIX1 is under the control  
16 of vaginal mesenchymal factors, BMP4, activin A and FGF7/10. Furthermore, *Six1*, *Runx1* and  
17 *Smad4* gene-dose-dependently activated  $\Delta$ Np63 expression in MDE within vaginal fornix. Using a  
18 mouse model of diethylstilbestrol (DES)-associated vaginal adenosis, we found DES action through  
19 epithelial estrogen receptor  $\alpha$  (ESR1) down-regulates SIX1 and RUNX1 in MDE within the vaginal  
20 fornix. This study establishes that the vaginal/ectocervical cell fate of MDE is regulated by a  
21 collaboration of multiple transcription factors including SMAD4, SIX1 and RUNX1, and the down-  
22 regulation of these key transcription factors leads to vaginal adenosis.

23

### 24 **Author Summary**

25 In embryogenesis, differentiation fate of cells is specified through constant communication between  
26 neighboring cells. In this study, we investigated the molecular mechanism of epithelial cell fate  
27 commitment in the lower female reproductive organs utilizing mouse genetic models. The cell fate of  
28 epithelial cells in the uterus, cervix and vagina is directed by signaling from mesenchymal cells. We

29 demonstrated that within the epithelial cells of the developing vagina, signals from mesenchymal cells  
30 are integrated into activities of transcription factors including SMAD4, RUNX1 and SIX1, which dose-  
31 dependently co-operate in the determination of vaginal epithelial cell fate. Disruption of these  
32 processes alters the cell fate from vaginal to uterine epithelium, resulting in a condition called vaginal  
33 adenosis, a putative precursor of vaginal adenocarcinoma. Women exposed to diethylstilbestrol  
34 (DES) in the womb have about 40 times the risk of developing vaginal adenocarcinoma. We  
35 determined that developmental exposure to DES induces vaginal adenosis by repressing SIX1 and  
36 RUNX1 through ESR1 in the epithelial cells. This discovery enhances the understanding of how early-  
37 life events, such as exposure to endocrine disruptors, causes vaginal adenosis, and thus may  
38 contribute to the prevention and therapeutic treatment of idiopathic vaginal adenocarcinoma.

39

## 40 INTRODUCTION

41 In mammals, the majority of female reproductive tract (FRT) develops from the Müllerian ducts (MDs)  
42 [1-3]. During embryogenesis, the MDs undergo a dynamic transformation from simple tubes  
43 consisting of homogeneous epithelium and mesenchyme into distinct organs, namely the oviduct,  
44 uterus, cervix and vagina [2, 4]. Classic tissue recombination studies have established that organ-  
45 specific mesenchyme induces the differentiation of MD epithelium (MDE) into epithelia with unique  
46 morphology and functions [5-7]. In the lower MD, epithelial cells are committed to become stratified  
47 squamous epithelium of ectocervix and vagina (together referred to as “vagina” hereafter), as the  
48 expression of  $\Delta Np63$  transcription factor is induced by vaginal mesenchyme [8-10]. In MDE of the  
49 developing vagina, the expression of  $\Delta Np63$  is activated by mesenchymal paracrine factors: bone  
50 morphogenetic protein (BMP) 4, activin A (ActA) and fibroblast growth factor (FGF) 7 or 10 [11, 12].  
51 SMAD4 is essential for the activation of  $\Delta Np63$  in MDE, and this transcription factor binds on the 5’  
52 sequence adjacent to the transcription start site (TSS) of  $\Delta Np63$  in future vaginal epithelium (VgE) but  
53 not in future uterine epithelium (UtE) [12]. This SMAD-dependent activation of the  $\Delta Np63$  locus  
54 requires runt-related transcription factor 1 (RUNX1), a co-transcription factor of SMADs. In MDE, the  
55 expression of RUNX1 is activated by ActA through a SMAD-independent mechanism [11]. In addition,  
56 activation of the mitogen-activated protein kinase (MAPK) pathway by FGF7/10-FGF receptor 2 IIIb  
57 (FGFR2IIIb) is essential for the activation of  $\Delta Np63$  locus in MDE [11]. BMP4-SMADs, ActA-RUNX1  
58 and FGF7/10-MAPK pathways are independently required for the vaginal cell fate commitment of  
59 MDE, as inactivation of *Smad4*, *Runx1* or *Fgfr2* in MDE results in uterine epithelial differentiation of  
60 MDE within the vagina, which is a congenital epithelial lesion called vaginal adenosis [11, 12].  
61 Nevertheless, once the  $\Delta Np63$  locus is activated in MDE, the transcriptional activity of the  $\Delta Np63$   
62 locus is cell-autonomously maintained by  $\Delta Np63$  protein itself [12]. Hence, the identity of VgE is  
63 maintained independent of mesenchymal factors [7, 8].

64 In this study, we investigated the role of sine oculis homeobox homolog 1 (SIX1) in the cell fate  
65 commitment of VgE. In mammals, *SIX1* and other five *SIX* genes (*SIX2–6*) synergistically regulate the

66 developmental process in multiple organs, including inner ear, salivary gland, kidney, lung, and  
67 trachea [13, 14]. In mouse FRTs, *Six1* is enriched in the vagina compared to the uterus [12, 15].  
68 However, its biological function in FRT remains unclear. Our current mouse genetic study reveals that  
69 SIX1 co-operates with RUNX1 and SMAD4 in the activation of the  $\Delta$ Np63 locus in MDE as a  
70 downstream transcription factor of BMP4, ActA and FGF7/10 in MDE. The etiology of vaginal  
71 adenosis, the putative precursor to vaginal adenocarcinoma (VAC) is commonly associated with  
72 intrauterine exposure to estrogenic compounds, including diethylstilbestrol (DES) [16]. Our previous  
73 studies established that DES induces vaginal adenosis through inhibition of  $\Delta$ Np63 expression in  
74 MDE. Our current study provides evidence that DES blocks the activation of  $\Delta$ Np63 locus in future  
75 VgE by repressing SIX1 and RUNX1 through epithelial estrogen receptor  $\alpha$  (ESR1). Such discoveries  
76 from our models may contribute to the prevention and therapeutic treatment of VACs, the etiology of  
77 which is currently unknown.

78

## 79 **RESULTS**

### 80 **Expression patterns of SIX1 in neonatal FRTs.**

81  $\Delta$ Np63 $\alpha$  is the dominant isoform of the transcription factor encoded by *Trp63/TP63* in mouse/human  
82 VgE [10, 12]. To identify molecules that control epithelial cell fate in the lower FRT, we conducted  
83 microarray analysis of neonatal vagina and uterus from MDE-specific conditional KO (cKO) and  
84 conditional heterozygous (cHet, control) mice of *Trp63* [12]. In the analysis, *Six1* was more enriched  
85 in vaginae than uteri (1.02 Log<sub>2</sub> fold-change, p = 0.0013) at postnatal day 2 (PD2), when induction of  
86  $\Delta$ Np63 expression is in progress in the vagina (Fig 1A). The expression level of *Six1* transcripts was  
87 not significantly different between *Trp63* cKO and cHET mice (Log<sub>2</sub> cHET/cKO = -0.176, p = 0.23)  
88 (GSE44697) [12], indicating that SIX1 is not the target of TRP63. Immunoblotting confirmed the  
89 results of microarray: SIX1 protein was detected in vaginae but not in uteri and ovaries from PD2  
90 C57BL/6J mice (Fig 1B).

91 Similarly to the expression of  $\Delta Np63$  in developing vagina, SIX1 expression progressed from posterior  
92 to anterior. At birth, SIX1 was expressed in the MDE of the lower vagina but not in the upper vagina  
93 and cervix, where RUNX1 already highlighted the future VgE (Fig 1C). By PD2, SIX1 expression  
94 extended to the cervix (Fig 1D), thus SIX1 and RUNX1 were co-expressed in the future VgE. There  
95 were substantial differences in the expression patterns of SIX1 and RUNX1 in neonatal FRTs. RUNX1  
96 was concentrated in the MDE in the cervical canal and the upper-portion of vagina, and the  
97 expression was reduced in the posterior portion from the outer-wall of the fornix (Fig 1D, outer-wall of  
98 fornix is marked with white dotted-line), whereas SIX1 was expressed at a similar level in both inner  
99 and outer walls of the fornix (Fig 1D). In addition, RUNX1 in MDE was down-regulated upon  
100 expression of  $\Delta Np63$  (Fig 1E, white arrow) [12], whereas SIX1 expression persisted in  $\Delta Np63$  positive  
101 cells (Fig 1E, yellow arrow).

102

#### 103 **SIX1 is a downstream transcription factor of SMAD4.**

104 SIX1 was expressed in the fornices of  $\Delta Np63$  cKO and cHET mice [12] at PD14, confirming that  
105 expression of SIX1 is independent of  $\Delta Np63$  (Fig 2A). In contrast, expression of SIX was SMAD4  
106 dependent: *Smad4* cKO mice [12] completely lacked the expression of SIX1 in the entire MDE as  
107 assessed at PD2 (n = 5) (Fig 2B).

108 The absence of SIX1 in *Smad4* cKO mice suggested that SIX1 is the downstream transcription factor  
109 of BMP4-SMAD pathway. Therefore, *Bmp4* was knocked out in vaginal mesenchyme utilizing  
110 *Twist2<sup>Cre</sup>* [17], and the effect on the expression of SIX1 in the lower Müllerian duct was assessed.  
111 Mesenchyme-specific *Bmp4* conditional KO (ms-cKO) was embryonic lethal. Hence, we collected  
112 pelvic organs from *Bmp4* conditional ms-cKO and ms-cHET mice at embryonic day 15.5, when most  
113 *Bmp4* ms-cKO embryos exhibited normal growth. At embryonic day 15.5 (Fig 2C), RUNX1 expression  
114 highlighted the anterior portion of MDE in both *Bmp4* ms-cKO and ms-cHET mice. On the other hand,  
115 SIX1 expression in MDE was low and mostly cytoplasmic at this age. Nevertheless, the SIX1 signal in  
116 MDE was higher in *Bmp4* ms-cHET mice compared to *Bmp4* ms-cKO mice (n=3 each, Fig 2D),

117 suggesting that BMP4 is a factor regulating SIX1 expression in FRT. However, the effect of loss of  
118 BMP4 on SIX1 expression was not comparable to the loss of SMAD4. This might be due to  
119 incomplete deletion of *Bmp4* or compensation by other BMP family members, as phosphorylation of  
120 SMAD1/5/9 was still present in the MDE of *Bmp4* cKO mice (Fig 2C).

121

### 122 **ActA-RUNX1 and FGF7/10-MAPK pathways positively regulate SIX1 in MDE**

123 Although SIX was expressed throughout the VgE in *Runx1* cKO mice [12] (Fig 3A), the expression of  
124 SIX1 in the fornix was significantly reduced compared to *Runx1* cHET mice (Fig 3B and 3C). Thus,  
125 the expression level of SIX1 in MDE is positively regulated by ActA-RUNX1 signaling activity. Similarly,  
126 SIX1 expression was slightly reduced in the fornix of *Fgfr2* cKO mice [11] (Fig 3D). However, SIX1  
127 expression in the fornix was uniformly up-regulated when the vaginal defect of *Fgfr2* cKO MDE was  
128 corrected with the expression of a constitutively active MAP2K1 (MAP2K1<sup>DD</sup>) [11] (Fig 3D and 3E),  
129 suggesting that MAPK activity modulates the expression level of SIX1 protein in the vaginal fornix.  
130 Accordingly, we tested the effect of BMP4, ActA and FGF10 on SIX1 expression in uterine organ  
131 culture assay. ActA and FGF10 had minimal to no effect on SIX1 expression in the epithelium of  
132 uterine explants (not shown). BMP4 slightly increased SIX1 in UtE, but the nuclear expression was  
133 mostly absent (Fig 3F). Even when all 3 factors were combined, nuclear SIX1 expression was  
134 detected only in portions of UtE showing  $\Delta$ Np63 expression, suggesting that SIX1 promotes  $\Delta$ Np63  
135 expression in MDE. In the uterine organ culture, growth factors in the medium must diffuse through  
136 the mesenchymal layers to act on UtE. Diffusion of FGF10 within connective tissues is limited  
137 because of its high affinity to heparan sulfate [18]. Accordingly, we replaced FGF10 with the  
138 expression of MAP2K1<sup>DD</sup>, which itself did not induce expression of  $\Delta$ Np63, RUNX1 and SIX1 [11].  
139 ActA and BMP4 efficiently induced SIX1 as well as  $\Delta$ Np63 in *Map2k1<sup>DD</sup>* transgenic UtE (Fig 3F and  
140 3G) indicating that SIX1 is the downstream transcription factor of BMP4-SMAD, ActA-RUNX1 and  
141 FGF7/10-MAPK in MDE.

142

143 ***Six1* and *Runx1* dose-dependently promote  $\Delta$ Np63 expression in MDE**

144 Since *Six1* null mice die before vaginal epithelial differentiation occurs [19], the role of SIX1 in VgE  
145 differentiation was assessed by genetically inactivating *Six1* in MDE by *Wnt7a-Cre* [20]. *Six1* cKO  
146 mice were born with the expected Mendelian ratio demonstrating no gross abnormality. However, loss  
147 of SIX1 in MDE affected the formation of  $\Delta$ Np63-positive basal epithelial layer in the vaginal fornix,  
148 and a substantial area of epithelium was negative for  $\Delta$ Np63-positive cells at PD4 (Fig 4A). Thus,  
149 SIX1 is one of key transcription factors that mediate the paracrine mesenchymal signaling in the  
150 vaginal cell fate commitment of MDE. Nevertheless, the defect of *Six1* cKO vagina was relatively  
151 minor, and a continuous  $\Delta$ Np63 positive layer formed in the fornix by PD14, as the lateral growth of  
152  $\Delta$ Np63 positive cells filled the gaps (not shown). The distinctive vaginal phenotypes of *Six1* cKO mice  
153 from *Smad4*, *Runx1* and *Fgfr2* cKO mice indicate that SIX1 is only one of many downstream factors  
154 mediating signaling from mesenchymal cells in MDE. While *Smad4*, *Runx1* and *Fgfr2* cKO mice lost  
155  $\Delta$ Np63 expression in MDE within the entire (*Smad4*, and *Fgfr2* cKO) or upper (*Runx1* cKO) vagina,  
156 the vaginal defect of *Six1* cKO mice was restricted to the epithelium on the outer-wall of vaginal fornix,  
157 where the expression of RUNX1 is reduced (Fig 1D). Meanwhile, RUNX1 expression in the vaginal  
158 fornix was not affected in *Six1* cKO mice (Fig 4A). Hence, we generated the compound conditional  
159 mutant mice of *Six1* and *Runx1* to assess if SIX1 and RUNX1 collaborate in the  $\Delta$ Np63 expression of  
160 MDE in the outer-wall of vaginal fornix. Monoallelic loss of *Runx1* in MDE exaggerated the effect of  
161 *Six1* allelic loss on  $\Delta$ Np63 expression: While monoallelic loss (cHET) of *Six1* or *Runx1* alone had no  
162 evident effect on the formation of  $\Delta$ Np63-positive basal layer, the *Six1*;*Runx1* double cHET mice had  
163 a significantly reduced number of  $\Delta$ Np63-positive basal cells in the outer-wall of fornix (Fig 4B and  
164 4C). The  $\Delta$ Np63-negative epithelial area expanded further to the inner wall of fornix when biallelic loss  
165 (cKO) of *Six1* was combined with monoallelic loss of *Runx1* (Fig 4B and 4C). The differentiation of  
166 MDE itself was not retarded in the mutant mice, as  $\Delta$ Np63 negative MDE expressed progesterone  
167 receptor (PGR), indicating uterine cell fate commitment [21] (Fig 4D).

168



169 **Gene-dose-dependent function of *Six1*, *Runx1* and *Smad4* in activation of  $\Delta$ Np63 locus in MDE.**

170 The distinctive vaginal phenotypes of *Six1* cKO and *Smad4* cKO mice indicate that SMAD4 works  
171 independent of SIX1 in vaginal cell fate commitment of MDE. Accordingly, we assessed if the efficacy  
172 of SIX1 and RUNX1 in the activation  $\Delta$ Np63 expression in MDE is affected by monoallelic loss of  
173 *Smad4* gene, which alone does not block the formation of  $\Delta$ Np63-positive basal layer in VgE [12].  
174 *Six1;Smad4* double cHET mice expressed  $\Delta$ Np63 throughout the vagina at PD4. However, the  
175 density of basal cells on the outer-wall of the fornix was reduced (Fig 5). The synergy between *Six1*  
176 and *Smad4* alleles became more prominent when an additional *Six1* allele was inactivated (Fig 5).  
177 Similarly, monoallelic loss of *Smad4* and *Runx1* synergistically affected the density of  $\Delta$ Np63 in the  
178 fornix. Accordingly, *Six1;Smad4;Runx1* triple cHET mice demonstrated gaps in the  $\Delta$ Np63-positive  
179 basal layer throughout the vaginal fornix (Fig 5). The effect of monoallelic *Smad4* loss on the density  
180 of TRP63 positive cells was statistically significant in mice with certain genotypes (Table 1). For  
181 instance, TRP63-positive cell density in the outer and inner fornix walls of *Six1* cHET mice was not  
182 significantly different from that in WT mice. However, the TRP63-positive cell density in *Six1* cHET  
183 mice became significantly lower with the monoallelic loss of *Smad4* (*Six1* cHET; *Smad4* cHET)  
184 compared to WT mice (Fig 5 B and C).

185

186 Table 1. One-way ANOVA followed by Tukey's multiple comparison test of TRP63-positive cell  
187 density in the outer and inner vaginal fornix walls of *Six1*, *Runx1*, *Smad4* compound mutant mice.

188

**Outer wall**

|                         |                         | <i>Smad4</i> WT |    |     |                  |    |        |                 | <i>Smad4</i> HET |        |        |                  |        |        |
|-------------------------|-------------------------|-----------------|----|-----|------------------|----|--------|-----------------|------------------|--------|--------|------------------|--------|--------|
|                         |                         | <i>Runx1</i> WT |    |     | <i>Runx1</i> HET |    |        | <i>Runx1</i> KO | <i>Runx1</i> WT  |        |        | <i>Runx1</i> HET |        |        |
|                         |                         | <i>Six1</i>     | WT | HET | KO               | WT | HET    | KO              | WT               | WT     | HET    | KO               | WT     | HET    |
| <b><i>Smad4</i> WT</b>  | <b><i>Runx1</i> WT</b>  | WT              | ■  | NS  | p<0.01           | NS | p<0.01 | p<0.01          | p<0.01           | NS     | p<0.01 | p<0.01           | p<0.01 | p<0.01 |
|                         |                         | HET             | ■  | ■   | NS               | NS | p<0.05 | p<0.01          | p<0.01           | NS     | NS     | p<0.01           | NS     | p<0.01 |
|                         |                         | KO              | ■  | ■   | ■                | NS | NS     | NS              | p<0.01           | NS     | NS     | NS               | NS     | p<0.01 |
|                         | <b><i>Runx1</i> HET</b> | WT              | ■  | ■   | ■                | ■  | p<0.05 | p<0.01          | p<0.01           | NS     | NS     | p<0.01           | NS     | p<0.01 |
|                         |                         | HET             | ■  | ■   | ■                | ■  | ■      | NS              | p<0.05           | p<0.01 | NS     | NS               | NS     | NS     |
|                         |                         | KO              | ■  | ■   | ■                | ■  | ■      | ■               | NS               | p<0.01 | NS     | NS               | NS     | NS     |
| <b><i>Runx1</i> KO</b>  | WT                      | ■               | ■  | ■   | ■                | ■  | ■      | ■               | p<0.01           | p<0.01 | NS     | p<0.01           | NS     |        |
| <b><i>Smad4</i> HET</b> | <b><i>Runx1</i> WT</b>  | WT              | ■  | ■   | ■                | ■  | ■      | ■               | ■                | ■      | NS     | p<0.01           | p<0.05 | p<0.01 |
|                         |                         | HET             | ■  | ■   | ■                | ■  | ■      | ■               | ■                | ■      | ■      | NS               | NS     | p<0.01 |
|                         |                         | KO              | ■  | ■   | ■                | ■  | ■      | ■               | ■                | ■      | ■      | ■                | NS     | NS     |
|                         | <b><i>Runx1</i> HET</b> | WT              | ■  | ■   | ■                | ■  | ■      | ■               | ■                | ■      | ■      | ■                | ■      | p<0.01 |

189

**Inner wall**

|                         |                         | <i>Smad4</i> WT |    |     |                  |    |        |                 | <i>Smad4</i> HET |        |        |                  |        |        |
|-------------------------|-------------------------|-----------------|----|-----|------------------|----|--------|-----------------|------------------|--------|--------|------------------|--------|--------|
|                         |                         | <i>Runx1</i> WT |    |     | <i>Runx1</i> HET |    |        | <i>Runx1</i> KO | <i>Runx1</i> WT  |        |        | <i>Runx1</i> HET |        |        |
|                         |                         | <i>Six1</i>     | WT | HET | KO               | WT | HET    | KO              | WT               | WT     | HET    | KO               | WT     | HET    |
| <b><i>Smad4</i> WT</b>  | <b><i>Runx1</i> WT</b>  | WT              | ■  | NS  | NS               | NS | p<0.01 | p<0.01          | p<0.01           | NS     | p<0.01 | p<0.01           | NS     | p<0.01 |
|                         |                         | HET             | ■  | ■   | NS               | NS | NS     | p<0.01          | p<0.01           | NS     | NS     | NS               | NS     | p<0.01 |
|                         |                         | KO              | ■  | ■   | ■                | NS | NS     | p<0.05          | p<0.01           | NS     | NS     | NS               | NS     | p<0.05 |
|                         | <b><i>Runx1</i> HET</b> | WT              | ■  | ■   | ■                | ■  | NS     | p<0.01          | p<0.01           | NS     | NS     | p<0.05           | NS     | p<0.01 |
|                         |                         | HET             | ■  | ■   | ■                | ■  | ■      | NS              | p<0.01           | NS     | NS     | NS               | NS     | NS     |
|                         |                         | KO              | ■  | ■   | ■                | ■  | ■      | ■               | p<0.01           | p<0.05 | NS     | NS               | p<0.05 | NS     |
| <b><i>Runx1</i> KO</b>  | WT                      | ■               | ■  | ■   | ■                | ■  | ■      | ■               | p<0.01           | p<0.01 | p<0.01 | p<0.01           | p<0.01 |        |
| <b><i>Smad4</i> HET</b> | <b><i>Runx1</i> WT</b>  | WT              | ■  | ■   | ■                | ■  | ■      | ■               | ■                | ■      | NS     | NS               | NS     | p<0.01 |
|                         |                         | HET             | ■  | ■   | ■                | ■  | ■      | ■               | ■                | ■      | ■      | NS               | NS     | NS     |
|                         |                         | KO              | ■  | ■   | ■                | ■  | ■      | ■               | ■                | ■      | ■      | ■                | NS     | NS     |
|                         | <b><i>Runx1</i> HET</b> | WT              | ■  | ■   | ■                | ■  | ■      | ■               | ■                | ■      | ■      | ■                | ■      | p<0.01 |

190

NS: not significant

## 191 **Regulatory elements of $\Delta$ Np63**

192 The gene-dose-dependent effect of *Six1*, *Runx1* and *Smad4* on  $\Delta$ Np63 activation suggests  
193 collaboration between these transcription factors in the vaginal cell fate commitment of MDE. The  
194 analysis of evolutionally conserved regions by ECR browser [22] identified numerous numbers of  
195 putative enhancer elements within *TP63/Trp63* locus. Many of these conserved sequences near  
196  $\Delta$ Np63 TSS contained binding sites for SMADs, RUNX1 as well as SIX1 (S1 Fig). The 5' sequence  
197 proximal to  $\Delta$ Np63 TSS, to which SMAD4 binds in VgE but not UtE, also contained binding sites of  
198 SMAD4, RUNX1 and SIX1 (S2A Fig). Thus, we genetically tested if the putative 5' proximal enhancer  
199 and the promoter (mm10 Chr16: 25801055-25802045) are sufficient to replicate the expression  
200 patterns of  $\Delta$ Np63 by generating transgenic mice (S2 Fig). However, the transgene (Cre-ires-EGFP)  
201 was not expressed in any tissues of 5 founders of transgenic mice. Furthermore, the progenies of the  
202 founders carrying *ROSA<sup>mT-mE</sup>* [23] and  $\Delta$ Np63-Cre-ires-EGFP alleles were also totally negative for  
203 EGFP/mEGFP (not shown), indicating the insufficiency of the sequence by itself to replicate the  
204 expression patterns of  $\Delta$ Np63 in MDE. Surprisingly,  $\Delta$ Np63-Cre knock-in (KI) mice, in which the  
205 coding sequence in the first exon of  $\Delta$ Np63 was replaced with Cre [24] also failed to express the Cre  
206 transgene in VgE: When  $\Delta$ Np63-Cre KI mice were crossed with *ROSA<sup>mT-mE</sup>* reporter mice, the most  
207 epithelial cells in vagina of *ROSA<sup>mT-mE</sup>;  $\Delta$ Np63-Cre* KI double-transgenic mice were negative for  
208 mEGFP (n=3, S2C Fig). ConTra v3 analysis [25] identified conserved binding sites of SMAD1,  
209 SMAD4 and RUNX1 in the sequence deleted in the genome of  $\Delta$ Np63-Cre KI mice (S1E Fig). Thus,  
210 the efficient activation of  $\Delta$ Np63 locus in MDE appeared to require cooperation of multiple regulatory  
211 elements including the protein coding sequence within exon 1. Notably, conserved binding sites of  
212 SIX1, RUNX1 and SMADs were not always clustered together, suggesting that these transcription  
213 factors may independently act on different enhancer elements. Thus, the gene-dose effects of *Six1*,  
214 *Runx1* and *Smad4* on  $\Delta$ Np63 activation may reflect the number of active enhancer-like elements that  
215 cooperate in the remodeling of  $\Delta$ Np63 locus.

216

217 **Diethylstilbestrol (DES) inhibits activation of  $\Delta$ Np63 locus in MDE through down-regulation of**  
218 **RUNX1 and SIX1.**

219 Previously, we demonstrated that down-regulation of RUNX1 is involved in the pathogenesis of DES-  
220 associated vaginal adenosis. DES down-regulated RUNX1 in MDE of vaginal fornix within 24 hours  
221 (Fig 6A). However, the effect of 24-hour DES-treatment was more prominent on SIX1 than RUNX1:  
222 Nuclear expression of SIX1 disappeared from the MDE in the vaginal fornix and the cervical canal of  
223 DES-treated mice (Fig 6A and 6B). DES slightly reduced pSMAD1/5/9 in the vaginal mesenchyme,  
224 while DES had no evident effect on the epithelial pSMAD1/5/9 (Fig 6C). In contrast, DES-treatment  
225 consistently increased MAPK1/3 activity in vaginal epithelium and mesenchyme (Fig 6C). Hence, the  
226 down-regulation of SIX1 was not likely due to the repression of BMP4 or FGF7/10 activity in MDE by  
227 DES.

228 Our previous tissue recombination study has established that DES blocks expression of  $\Delta$ Np63 in  
229 MDE through estrogen receptor  $\alpha$  (ESR1) within epithelial cells [4, 8]. The expression patterns of SIX1,  
230 RUNX1 and  $\Delta$ Np63 in the fornix of *Esr1* cKO mice were indistinguishable from these in wild type mice  
231 at PD3 (Fig 7A). In agreement with the tissue recombination study, DES did not block the induction of  
232  $\Delta$ Np63 in the VgE when *Esr1* was deleted in MDE by *Wnt7a-Cre* (*Esr1* cKO mice) (Fig 7B). Moreover,  
233 DES exposure promoted the expression of  $\Delta$ Np63 in VgE in *Esr1* cKO mice (Fig 7B), forming a  
234 continuous layer of  $\Delta$ Np63-positive cells by PD3,  $\geq 1$  day earlier than normal development. Therefore,  
235 ESR1 in epithelium and mesenchyme has the opposite effect on the induction of  $\Delta$ Np63 (S3 Fig). In  
236 fact, DES-treatment induced RUNX1 and SIX1 in the UtE of *Esr1* cKO mice by PD3 (not shown).  
237 DES-ESR1 activity attenuates the expression of SIX1 and RUNX1 in MDE cell-autonomously, as the  
238 expression of SIX1 and RUNX1 was maintained in the vaginal fornices of *Esr1* cKO mice (Fig 7C).  
239 Interestingly, the effect of DES on MAPK1/3 activity in MDE and mesenchyme was exaggerated in the  
240 vagina of *Esr1* cKO mice (Fig 7C), indicating that epithelial ESR1 repressed the FGF7/10-MAPK1/3  
241 signaling pathway in both vaginal epithelium and mesenchyme. A continuous layer of  $\Delta$ Np63-positive  
242 basal cells formed by PD3 on the outer wall of vaginal fornix in MAP2K1<sup>DD</sup> conditional transgenic mice

243 (Fig 7D, control), suggesting that DES promotes vaginal differentiation of MDE by activating the  
244 MAPK pathway. Nevertheless, DES repressed the expression of SIX1 and  $\Delta$ Np63 in MDE expressing  
245 MAP2K1<sup>DD</sup> (Fig 7D, DES). Thus, the activation of MAPK pathway alone did not protect MDE from  
246 DES-induced vaginal adenosis.

247

## 248 **DISCUSSION**

249 It has long been known that the differentiation of MDE into distinctive epithelia of uterus and vagina is  
250 under the control of organ-specific mesenchyme [5]. Through a series of studies with genetically  
251 engineered mice, our group has established that  $\Delta$ Np63 is the master regulator of vaginal epithelial  
252 differentiation in MDE [8], and that the expression of  $\Delta$ Np63 is induced by mesenchymal paracrine  
253 factors, BMP4, ActA and FGF7/10 [11, 12]. Within MDE, the signals from underlying mesenchyme are  
254 transduced by BMP4-SMADs, ActA-RUNX1 and FGFs-MAPKs. Since mouse vaginal mesenchyme  
255 can induce  $\Delta$ Np63 and squamous differentiation in human MDE, the molecules that mediate the  
256 communication between mesenchyme and epithelium in the commitment of MDE to vaginal cell fate  
257 must be common between these two species [26].

258 In this study, we identified SIX1 as a key transcription factor that mediates the mesenchymal signals  
259 in the activation of  $\Delta$ Np63 locus during vaginal cell fate commitment of MDE. Subsequently, we  
260 propose that vaginal mesenchymal factors induce MDE to commit to vaginal epithelial cell fate by  
261 activating  $\Delta$ Np63 locus through cooperation of multiple enhancer elements, which are activated by  
262 SMADs, RUNX1 and/or SIX1 (Fig. 8). An enhancer is a genomic region of few hundred base pairs  
263 that contains clustered binding-sites for multiple transcription factors. Although many transcription  
264 factors cannot bind their target site in the context of nucleosomal DNA, enhancer-mediated  
265 simultaneous-binding of multiple transcription factors can overcome the nucleosome barrier [27]. Thus,  
266 enhancers integrate multiple signaling pathways through binding of downstream effectors [28, 29]. In  
267 cell fate commitment of MDE to VgE, BMP, ActA and FGF pathways are integrated to prime VgE-  
268 specific gene expression programs in MDE through the simultaneous binding of SMADs, RUNX1 and

269 SIX1 to  $\Delta$ Np63 enhancers (Fig. 8). Approximately 80% of all characterized mouse enhancers show  
270 tissue-specific expression [30]. In this regard, the enhancers that regulate  $\Delta$ Np63 expression in MDE  
271 must be distinctive from those in the skin because *Six1* null [19] and *Runx1* null [31] mice do not  
272 exhibit the deformation of skin and appendages observed in  $\Delta$ Np63 mutant mice [32]. The  
273 identification of key regulator elements of  $\Delta$ Np63 in MDE is imperative to fully appreciate the  
274 pathogenesis of vaginal adenosis, which is a result of faulty cell fate commitment of VgE. However,  
275 enhancers can regulate the expression of genes that are mega-bases apart [30, 33]. Therefore, the  
276 identification of key regulator elements of  $\Delta$ Np63 in MDE requires genome-wide screening of  
277 transcription factor binding sites by chromatin immunoprecipitation-sequencing (ChIP-seq). However,  
278 the usage of  $\Delta$ Np63 enhancers must be unique between different regions of MDE as demonstrated by  
279 the difference in the requirement of SMAD4, RUNX1 and SIX1 for  $\Delta$ Np63 expression in mouse  
280 genetic studies. Given the heterogeneity of the cell population, the narrow developmental time window,  
281 and the small tissue amount of MDE, the identification of  $\Delta$ Np63 regulatory elements in MDE by  
282 current standard techniques is challenging.

283 Most vaginal adenocarcinomas (VACs) are believed to arise from vaginal adenosis because of the  
284 presence of adenosis lesions at the primary site of VACs. Hence, better understanding in etiology of  
285 vaginal adenosis is particularly crucial in order to develop preventive and therapeutic approaches for  
286 VACs. In the past, *in utero* DES-exposure was the primary cause of vaginal adenosis and VAC. Since  
287 the expression patterns of  $\Delta$ Np63 and RUNX1 as well as the effect of DES on the expression of these  
288 transcription factors are identical between human and mouse MDE [1, 10, 26, 34], the molecular  
289 model established in mice (Fig 8) should explain the etiology of vaginal adenosis in DES-exposed  
290 women. However, VACs occur in women who have no history of DES exposure [16, 35]. Because the  
291 expression of  $\Delta$ Np63 in the lower MDE occurs during the first trimester in human fetus [10, 34], the  
292 pathogenesis of non-DES-associated VACs should still involve an *in utero* event that disturbs the  
293 vaginal epithelial cell fate commitment in MDE. In this regard, exposure to a compound that inhibits  
294 any pathways/molecules described in Fig 8 can lead to vaginal adenosis. As cell fate commitment of

295 mouse VgE occurs in the first week of postnatal development [3, 10], neonatal mice would be useful  
296 to screen medical and environmental chemicals that interfere  $\Delta$ Np63 expression in VgE.  
297 Some studies suggest the *de novo* formation of adenosis in the vagina of adult women associated  
298 with medical treatments [36-38]. However, given the low detection sensitivity of routine colposcopy  
299 and cytology screenings for adenosis, adenosis cases that appear to be *de novo* are likely due to an  
300 increased visibility of previously imperceptible adenosis lesions enlarged by a reactive change to  
301 medical treatments.

302 In addition to vaginal adenosis, perinatal DES exposure of female mice induces uterine squamous  
303 metaplasia [39], a formation of squamous epithelium within the simple columnar UtE. Interestingly, the  
304 gene expression pattern of uterine squamous metaplasia lesions is identical to that of normal VgE [4,  
305 8], indicating that uterine squamous metaplasia is vaginal cell fate commitment of MDE within the  
306 uterus. Thus, developmental DES exposure elicits opposite effects on the cell fate commitment of  
307 MDE in developing uterus versus vagina. This intriguing dual-effect of DES is explained by the  
308 opposite functions of epithelial versus mesenchymal ESR1. As shown in our current study, DES  
309 action through epithelial ESR1 interferes the activation of  $\Delta$ Np63 locus whereas DES action through  
310 mesenchymal ESR1 promotes  $\Delta$ Np63 expression (S3 Fig). When ESR1 is expressed in both  
311 epithelium and mesenchyme, DES effects via epithelial ESR1 are dominant. In developing uterus and  
312 vagina, ESR1 is initially expressed only in mesenchymal cells, and ESR1 expression in MDE occurs  
313 at the posterior end and gradually progresses anterior [7, 34]. DES exposure most efficiently induces  
314 vaginal adenosis at the first trimester of human fetuses and the postnatal day 1- 5 in neonatal mice,  
315 when ESR1 is expressed in the MDE of the vagina but not the uterus. Accordingly, DES blocks  
316  $\Delta$ Np63 activation in the vagina through epithelial ESR1 and activates  $\Delta$ Np63 in the uterus through  
317 mesenchymal ESR1. Our current study predicts that DES induces expression of BMPs, FGFs and  
318 Activin/TGF $\beta$  through ESR1 in the uterine mesenchyme. On the other hand, molecular mechanisms  
319 through which DES represses RUNX1 and SIX1 in MDE remain unclear. Elucidating the underlying

320 molecular pathogenesis of DES-associated adenosis will help identify etiology of non-DES-associated  
321 vaginal adenosis and VAC.

322

323

## 324 **METHODS**

### 325 **Mouse models**

326 All animal procedures were approved by the Animal Care and Use Committee in the Ohio State  
327 University. The mouse strains carrying the following alleles were utilized: *Six1*<sup>flox</sup> [*Six1*<sup>tm2.1Mair</sup>] [40],  
328 *Trp63*<sup>flox</sup> [*Trp63*<sup>tm3.2Brd</sup>] [41], ΔNp63-EGFP knock-in (*Trp63*<sup>ΔNp63-EGFP-KI</sup>) [32], *Runx1*<sup>flox</sup> [*Runx1*<sup>tm1Tani</sup>]  
329 [42], *Fgfr2*<sup>flox</sup> [*Fgfr2*<sup>tm1Dor/J</sup>] [43], *ROSA*<sup>mT-mE</sup> [*Gt(ROSA)26Sor*<sup>tm4(ACTB-tdTomato,-EGFP)Luo/J</sup>] [23],  
330 *ROSA*<sup>MAP2K1DD</sup> [*Gt(ROSA)26Sor*<sup>tm8(Map2k1\*,EGFP)Rsky/J</sup>] [44], *Smad4*<sup>flox</sup> (*Smad4*<sup>tm2.1Cxd/J</sup>) [45], *Esr1*<sup>flox</sup> [46],  
331 *Bmp4*<sup>flox</sup> [*Bmp4*<sup>tm1Jfm</sup>] [47], *Twist2*<sup>Cre</sup> [*Twist2*<sup>tm1.1(cre)Dor</sup>] [17], *Pax2-Cre* [Tg(*Pax2-cre*)1Akg] (MMRRC)  
332 [48], *Wnt7a-Cre* [20] and ΔNp63-Cre [*Trp63*<sup>tm1.1(cre)Ssig/J</sup>] [24]. C57BL/6J mice were purchased from  
333 Jackson Laboratory (Bar Harbor, ME). MDE-specific conditional knockout (cKO) and conditional  
334 heterozygous (cHET) mice were generated by crossing lines carrying floxed alleles with *Wnt7a-Cre*  
335 mice, except for *Trp63*<sup>flox</sup> mice, which were crossed with *Pax2-Cre*. *Twist2*<sup>Cre</sup> mice were used for  
336 mesenchyme-specific deletion of *Bmp4*. The day of birth was count as PD1.

337

### 338 **Neonatal DES treatment**

339 A ~40 μg DES slow-release pellet was prepared as previously described [12]. The ~0.04 mg/mm DES  
340 filled tubing was cut into 1 mm length and subcutaneously injected into newborn mice using a 19  
341 gauge trocar.

342

### 343 **Immunofluorescence (IF) and immunohistochemistry (IHC)**



344 IF and IHC assays were performed as previously described [49]. Briefly, tissues were fixed with  
345 Modified Davidson's fixative solution (Electron Microscopy Sciences, Hatfield, PA), processed into  
346 paraffin, and sectioned at 5  $\mu$ m. The sections were heated in 10 mM sodium citrate buffer (pH 6.0)  
347 containing 0.05% Tween-20 for 35 min in an Electric Pressure Cooker. The following primary  
348 antibodies were used at the indicated dilutions: anti-CTNNB1 (CAT-5H10) (1:100, 13-8400) from  
349 ThermoFisher (Waltham, MA); anti-TRP63 (4A4) (1:200, 790-4509) from Ventana Medical Systems  
350 (Tucson, AZ); anti- $\Delta$ Np63 (1:2,000, PC373) from Millipore (Billerica, MA); anti-PGR (1:200, A0098)  
351 from Agilent Technologies (Santa Clara, CA); anti-RUNX1 (2593-1, 1:400) from Epitomics  
352 (Burlingame, CA); anti-phospho (p)-MAPK1/3 (p-T202/Y201, 1:30, #4370) and anti-pSMAD1/5/9 (1:50,  
353 #9511) from Cell Signaling Technology (Danvers, MA); anti-GFP (1:100, ab6673) from Abcam  
354 (Cambridge, MA); anti-SIX1 (1:800, HPA001893) from Sigma-Aldrich (St. Louis, MO); anti-ESR1  
355 (1:100, RM-9101) from Lab Vision (Fremont, CA). For IF assay, Alexa-Fluor594 anti-mouse IgG (H+L)  
356 (1:1,000, 715-586-150) and Alexa-Fluor488 anti-rabbit IgG (H+L) (1:1,000, 711-546-152) from  
357 Jackson ImmunoResearch (West Grove, PA) were used for the secondary antibodies, and  
358 bisbenzimidazole H 33258 (Hoechst 33258, 1:10,000, Sigma-Aldrich) was used for nuclear staining. For  
359 IHC with DAB (3,3'-diaminobenzidine, Sigma-Aldrich), biotinylated anti-rat IgG (H+L) (1:800, 712-066-  
360 153) was used in conjunction with streptavidin-horseradish peroxidase (1:400, 016-030-084, Jackson  
361 ImmunoResearch). Micrographs were captured using a BZ-9000 microscope (Keyence, Osaka,  
362 Japan) under identical conditions between samples for each antibody. The contrast of images was  
363 adjusted by applying identical parameters to the images for each antibody with the batch-process  
364 function of Adobe Photoshop CS6 (Adobe, CA, San Jose, CA, USA). To capture a wide area in a  
365 single image, tissue sections were scanned in multiple frames, and the images were automatically  
366 merged together utilizing the Image Stitching function of image analysis tool.

367

### 368 **Morphometric analysis**

369 The methods for the quantitative analysis on the squamous transformation of MDE [12] and the IF  
370 signal [50] were previously described. We adapted these methods with some modifications. The  
371 length of epithelium at the basal lamina was measured in the outer-wall of vaginal fornix in at least 2  
372 sections per animal in TRP63 immunostained sections. The proportion of epithelium with  $\Delta$ Np63-  
373 psotive basal layer was calculated by “length of epithelial basement membrane associated with  
374 TRP63-positive cells”  $\div$  “total epithelial basement membrane length” x 100, for each mouse.

375 Basal cell density in the outer and inner fornix walls was calculated by number of TRP63-positive  
376 pixels per epithelial basement membrane length. In tissue sections of vaginal fornices stained for  
377 TRP63, epithelial areas were manually selected, and the pixels positive for TRP63 signal within the  
378 epithelium were selected by adjusting the lower threshold for positivity to exclude background noise.  
379 Epithelial basement membrane was manually marked on the IF images, and the p63-positive area  
380 and the basement membrane length were measured utilizing Image J (NIH, Bethesda, MD). Analysis  
381 was performed on  $\geq 4$  fornice from  $\geq 3$  mice per group. The value in each fornix was considered as a  
382 single measurement. Statistical significance was analyzed by One-way ANOVA with post-hoc  
383 Tukey’s HSD Test.

384

### 385 **SIX1 IF analysis**

386 Quantitative IF assay was performed as previously described with modifications [50]. Tissue sections  
387 for an analysis were stained together, and images were captured at the same time under the identical  
388 conditions. Images of  $\geq 4$  tissue sections from  $n \geq 3$  independent animals were analyzed for each  
389 group. Epithelial areas were manually selected, and the signal intensity per pixel within the epithelial  
390 area was measured by Image J. In all experiments, approximately equivalent areas were analyzed in  
391 each sample, and there was no significant intragroup difference in the average signal intensity. Thus,  
392 all samples in each group were plotted together, and the distributions of signals were compared  
393 between groups by the Mann–Whitney U test with continuity correction.

394

### 395 **Immunoblot analysis**

396 Ovaries, uteri and vaginae from PD2 mice (5- 6 mice per blot) were homogenized with a minipebble in  
397 ice-cold lysis buffer containing protease (cOmplete Protease Inhibitor Cocktail,Roche) and  
398 phosphatase (phoSTOP, Roche) inhibitors and loaded onto NuPAGE 4–12% Bis-Tris precast SDS-  
399 PAGE gel. Proteins were transferred to a PVDF membrane (Millipore Sigma, St. Louis, MO, USA).  
400 The membrane was incubated with anti-RUNX1 antibody (1: 2000, Epitomics), anti-SIX1 antibody  
401 (1:1,000, Millipore Sigma) and GAPDH (1: 2000, G8795, Millipore Sigma) in the OdysseyR Blocking  
402 buffer (TBS) (from LI-COR Biosciences, NE, USA) overnight at 4 °C. IRDye® 800CW Donkey anti-  
403 rabbit IgG, IRDye® 680LT Donkey anti-rabbit IgG and IRDye® 680LT Donkey anti-mouse IgG were  
404 used for the secondary antibodies. The signal was detected using Odyssey CLx Imaging System (LI-  
405 COR Biosciences, NE, USA). The analysis was repeated 3 times with independent samples.

406

### 407 **Uterine organ culture**

408 Uterine hanging drop organ culture was performed as previously described with minor modifications  
409 [11]. Briefly, uteri were dissected from PD1 mice, cleaned by removing connective tissues, and cut  
410 into 3 pieces per uterine-horn in Dulbecco's Modified Eagle Medium/Nutrient Mixture F-12  
411 (DMEM/F12, 11039, Life Technologies) containing 10 nM ICI 182,780 (Sigma-Aldrich). The uterine  
412 pieces were then placed in autoclaved PCR tube caps (AXYGEN, Union City, CA) with basal medium  
413 (10 nM ICI 182,780 DMEM/F12 with Insulin-Transferrin-Selenium and Antibiotic-Antimycotic)  
414 with/without 20 ng/ml human recombinant BMP4, ActA and/or FGF10 (Life Technologies), inverted,  
415 and incubated. Uterine pieces were cultured up to 3 days with daily medium change, fixed with  
416 Modified Davidson's fixative, and processed for histological analysis.

417

### 418 **ACKNOWLEDGMENTS**

419 The authors thank Dr. Altea Rocci, Shayna Wallace, Justin Thomas and the Solid Tumor Biology  
420 Research group histology core for technical help. This work was supported by the National Institutes  
421 of Health [RO1CA154358, RO1HD064402, P30CA016058 to T.K.].

422

423

## 424 REFERENCES

- 425 1. Robboy SJ, Kurita T, Baskin L, Cunha GR. New insights into human female reproductive tract  
426 development. *Differentiation; research in biological diversity*. 2017;97:9-22. doi:  
427 10.1016/j.diff.2017.08.002. PubMed PMID: 28918284.
- 428 2. Kurita T. Developmental origin of vaginal epithelium. *Differentiation; research in biological*  
429 *diversity*. 2010;80(2-3):99-105. Epub 2010/07/20. doi: 10.1016/j.diff.2010.06.007. PubMed PMID:  
430 20638775; PubMed Central PMCID: PMC2943051.
- 431 3. Kurita T, Nakamura H. Embryology of the uterus. In: Aplin JD, Fazleabas AT, Glasser SR,  
432 Giudice LC, editors. *Endometrium*. 2 ed. London, UK: Informa UK Ltd.; 2008. p. 1-18.
- 433 4. Kurita T. Normal and abnormal epithelial differentiation in the female reproductive tract.  
434 *Differentiation; research in biological diversity*. 2011;82(3):117-26. Epub 2011/05/27. doi:  
435 10.1016/j.diff.2011.04.008. PubMed PMID: 21612855; PubMed Central PMCID: PMC3178098.
- 436 5. Cunha GR. Stromal induction and specification of morphogenesis and cytodifferentiation of the  
437 epithelia of the Müllerian ducts and urogenital sinus during development of the uterus and vagina in  
438 mice. *The Journal of experimental zoology*. 1976;196(3):361-70. PubMed PMID: 932664.
- 439 6. Boutin E, Sanderson R, Bernfield M, Cunha GR. Expression of syndecan, a cell surface  
440 proteoglycan, correlates with induced changes in cellular organization. *The Journal of cell biology*.  
441 1989;107:605a.
- 442 7. Kurita T, Cooke PS, Cunha GR. Epithelial-stromal tissue interaction in paramesonephric  
443 (Mullerian) epithelial differentiation. *Developmental biology*. 2001;240(1):194-211. Epub 2002/01/11.  
444 doi: 10.1006/dbio.2001.0458. PubMed PMID: 11784056.

- 445 8. Kurita T, Mills AA, Cunha GR. Roles of p63 in the diethylstilbestrol-induced cervicovaginal  
446 adenosis. *Development* (Cambridge, England). 2004;131(7):1639-49. Epub 2004/03/05. doi:  
447 10.1242/dev.01038. PubMed PMID: 14998922.
- 448 9. Kurita T, Cunha GR. Roles of p63 in differentiation of Mullerian duct epithelial cells. *Annals of*  
449 *the New York Academy of Sciences*. 2001;948:9-12. Epub 2002/01/25. PubMed PMID: 11795399.
- 450 10. Kurita T, Cunha GR, Robboy SJ, Mills AA, Medina RT. Differential expression of p63 isoforms  
451 in female reproductive organs. *Mechanisms of development*. 2005;122(9):1043-55. Epub 2005/06/01.  
452 doi: 10.1016/j.mod.2005.04.008. PubMed PMID: 15922574.
- 453 11. Terakawa J, Rocchi A, Serna VA, Bottinger EP, Graff JM, Kurita T. FGFR2IIIb-MAPK activity  
454 is required for epithelial cell fate decision in the lower Mullerian duct. *Molecular endocrinology*  
455 (Baltimore, Md. 2016;me20161027. doi: 10.1210/me.2016-1027. PubMed PMID: 27164167.
- 456 12. Laronda MM, Unno K, Ishi K, Serna VA, Butler LM, Mills AA, et al. Diethylstilbestrol induces  
457 vaginal adenosis by disrupting SMAD/RUNX1-mediated cell fate decision in the Mullerian duct  
458 epithelium. *Developmental biology*. 2013;381(1):5-16. Epub 2013/07/09. doi:  
459 10.1016/j.ydbio.2013.06.024. PubMed PMID: 23830984.
- 460 13. Kawakami K, Sato S, Ozaki H, Ikeda K. Six family genes--structure and function as  
461 transcription factors and their roles in development. *Bioessays*. 2000;22(7):616-26. doi:  
462 10.1002/1521-1878(200007)22:7<616::AID-BIES4>3.0.CO;2-R. PubMed PMID: 10878574.
- 463 14. Kochhar A, Fischer SM, Kimberling WJ, Smith RJ. Branchio-oto-renal syndrome. *Am J Med*  
464 *Genet A*. 2007;143A(14):1671-8. doi: 10.1002/ajmg.a.31561. PubMed PMID: 17238186.
- 465 15. Jefferson WN, Chevalier DM, Phelps JY, Cantor AM, Padilla-Banks E, Newbold RR, et al.  
466 Persistently altered epigenetic marks in the mouse uterus after neonatal estrogen exposure.  
467 *Molecular endocrinology* (Baltimore, Md. 2013;27(10):1666-77. doi: 10.1210/me.2013-1211. PubMed  
468 PMID: 24002655; PubMed Central PMCID: PMC3787132.
- 469 16. Laronda MM, Unno K, Butler LM, Kurita T. The development of cervical and vaginal adenosis  
470 as a result of diethylstilbestrol exposure in utero. *Differentiation; research in biological diversity*.

- 471 2012;84(3):252-60. Epub 2012/06/12. doi: 10.1016/j.diff.2012.05.004. PubMed PMID: 22682699;  
472 PubMed Central PMCID: PMC3443265.
- 473 17. Sosic D, Richardson JA, Yu K, Ornitz DM, Olson EN. Twist regulates cytokine gene  
474 expression through a negative feedback loop that represses NF-kappaB activity. *Cell*.  
475 2003;112(2):169-80. PubMed PMID: 12553906.
- 476 18. Izvolsky KI, Shoykhet D, Yang Y, Yu Q, Nugent MA, Cardoso WV. Heparan sulfate-FGF10  
477 interactions during lung morphogenesis. *Developmental biology*. 2003;258(1):185-200. PubMed  
478 PMID: 12781692.
- 479 19. Laclef C, Hamard G, Demignon J, Souil E, Houbron C, Maire P. Altered myogenesis in Six1-  
480 deficient mice. *Development (Cambridge, England)*. 2003;130(10):2239-52. PubMed PMID: 12668636.
- 481 20. Winuthayanon W, Hewitt SC, Orvis GD, Behringer RR, Korach KS. Uterine epithelial estrogen  
482 receptor alpha is dispensable for proliferation but essential for complete biological and biochemical  
483 responses. *Proceedings of the National Academy of Sciences of the United States of America*.  
484 2010;107(45):19272-7. Epub 2010/10/27. doi: 10.1073/pnas.1013226107. PubMed PMID: 20974921;  
485 PubMed Central PMCID: PMC2984169.
- 486 21. Kurita T, Lee KJ, Cooke PS, Taylor JA, Lubahn DB, Cunha GR. Paracrine regulation of  
487 epithelial progesterone receptor by estradiol in the mouse female reproductive tract. *Biology of  
488 reproduction*. 2000;62(4):821-30. Epub 2000/03/22. PubMed PMID: 10727249.
- 489 22. Ovcharenko I, Nobrega MA, Loots GG, Stubbs L. ECR Browser: a tool for visualizing and  
490 accessing data from comparisons of multiple vertebrate genomes. *Nucleic acids research*.  
491 2004;32(Web Server issue):W280-6. doi: 10.1093/nar/gkh355. PubMed PMID: 15215395; PubMed  
492 Central PMCID: PMC441493.
- 493 23. Muzumdar MD, Tasic B, Miyamichi K, Li L, Luo L. A global double-fluorescent Cre reporter  
494 mouse. *Genesis*. 2007;45(9):593-605. PubMed PMID: 17868096.
- 495 24. Pignon JC, Grisanzio C, Geng Y, Song J, Shivdasani RA, Signoretti S. p63-expressing cells  
496 are the stem cells of developing prostate, bladder, and colorectal epithelia. *Proceedings of the*

- 497 National Academy of Sciences of the United States of America. 2013;110(20):8105-10. doi:  
498 10.1073/pnas.1221216110. PubMed PMID: 23620512; PubMed Central PMCID: PMC3657776.
- 499 25. Kreft L, Soete A, Hulpiau P, Botzki A, Saeys Y, De Bleser P. ConTra v3: a tool to identify  
500 transcription factor binding sites across species, update 2017. *Nucleic acids research*.  
501 2017;45(W1):W490-W4. doi: 10.1093/nar/gkx376. PubMed PMID: 28472390; PubMed Central  
502 PMCID: PMC5570180.
- 503 26. Cunha GR, Kurita T, Cao M, Shen J, Cooke PS, Robboy SJ, et al. Tissue interactions and  
504 estrogenic response during human female fetal reproductive tract development. *Differentiation;*  
505 *research in biological diversity*. 2018;101:39-45. doi: 10.1016/j.diff.2018.04.002. PubMed PMID:  
506 29684808; PubMed Central PMCID: PMC5993605.
- 507 27. Zaret KS, Carroll JS. Pioneer transcription factors: establishing competence for gene  
508 expression. *Genes & development*. 2011;25(21):2227-41. doi: 10.1101/gad.176826.111. PubMed  
509 PMID: 22056668; PubMed Central PMCID: PMC3219227.
- 510 28. Slattery M, Zhou T, Yang L, Dantas Machado AC, Gordan R, Rohs R. Absence of a simple  
511 code: how transcription factors read the genome. *Trends Biochem Sci*. 2014;39(9):381-99. doi:  
512 10.1016/j.tibs.2014.07.002. PubMed PMID: 25129887; PubMed Central PMCID: PMC4149858.
- 513 29. Wittkopp PJ, Kalay G. Cis-regulatory elements: molecular mechanisms and evolutionary  
514 processes underlying divergence. *Nat Rev Genet*. 2012;13(1):59-69. doi: 10.1038/nrg3095. PubMed  
515 PMID: 22143240.
- 516 30. Wu H, Nord AS, Akiyama JA, Shoukry M, Afzal V, Rubin EM, et al. Tissue-specific RNA  
517 expression marks distant-acting developmental enhancers. *PLoS Genet*. 2014;10(9):e1004610. doi:  
518 10.1371/journal.pgen.1004610. PubMed PMID: 25188404; PubMed Central PMCID: PMC4154669.
- 519 31. Wang Q, Stacy T, Binder M, Marin-Padilla M, Sharpe AH, Speck NA. Disruption of the *Cbfa2*  
520 gene causes necrosis and hemorrhaging in the central nervous system and blocks definitive  
521 hematopoiesis. *Proceedings of the National Academy of Sciences of the United States of America*.  
522 1996;93(8):3444-9. PubMed PMID: 8622955; PubMed Central PMCID: PMC39628.

- 523 32. Romano RA, Smalley K, Magraw C, Serna VA, Kurita T, Raghavan S, et al. DeltaNp63  
524 knockout mice reveal its indispensable role as a master regulator of epithelial development and  
525 differentiation. *Development (Cambridge, England)*. 2012;139(4):772-82. Epub 2012/01/26. doi:  
526 10.1242/dev.071191. PubMed PMID: 22274697; PubMed Central PMCID: PMC3265062.
- 527 33. de Laat W, Duboule D. Topology of mammalian developmental enhancers and their regulatory  
528 landscapes. *Nature*. 2013;502(7472):499-506. doi: 10.1038/nature12753. PubMed PMID: 24153303.
- 529 34. Cunha GR, Kurita T, Cao M, Shen J, Robboy S, Baskin L. Molecular mechanisms of  
530 development of the human fetal female reproductive tract. *Differentiation; research in biological*  
531 *diversity*. 2017;97:54-72. doi: 10.1016/j.diff.2017.07.003. PubMed PMID: 29053991.
- 532 35. Smith EK, White MC, Weir HK, Peipins LA, Thompson TD. Higher incidence of clear cell  
533 adenocarcinoma of the cervix and vagina among women born between 1947 and 1971 in the United  
534 States. *Cancer Causes Control*. 2012;23(1):207-11. Epub 2011/10/22. doi: 10.1007/s10552-011-  
535 9855-z. PubMed PMID: 22015647; PubMed Central PMCID: PMC3230753.
- 536 36. Goodman A, Zukerberg LR, Nikrui N, Scully RE. Vaginal adenosis and clear cell carcinoma  
537 after 5-fluorouracil treatment for condylomas. *Cancer*. 1991;68(7):1628-32. PubMed PMID: 1893363.
- 538 37. Dungar CF, Wilkinson EJ. Vaginal columnar cell metaplasia. An acquired adenosis associated  
539 with topical 5-fluorouracil therapy. *The Journal of reproductive medicine*. 1995;40(5):361-6. PubMed  
540 PMID: 7608876.
- 541 38. Bornstein J, Sova Y, Atad J, Lurie M, Abramovici H. Development of vaginal adenosis  
542 following combined 5-fluorouracil and carbon dioxide laser treatments for diffuse vaginal  
543 condylomatosis. *Obstetrics and gynecology*. 1993;81(5 ( Pt 2)):896-8. PubMed PMID: 8469512.
- 544 39. McLachlan JA, Newbold RR, Bullock BC. Long-term effects on the female mouse genital tract  
545 associated with prenatal exposure to diethylstilbestrol. *Cancer Res*. 1980;40(11):3988-99. PubMed  
546 PMID: 7193511.
- 547 40. Le Grand F, Grifone R, Mourikis P, Houbron C, Gigaud C, Pujol J, et al. Six1 regulates stem  
548 cell repair potential and self-renewal during skeletal muscle regeneration. *The Journal of cell biology*.



- 549 2012;198(5):815-32. doi: 10.1083/jcb.201201050. PubMed PMID: 22945933; PubMed Central  
550 PMCID: PMC3432771.
- 551 41. Mills AA, Qi Y, Bradley A. Conditional inactivation of p63 by Cre-mediated excision. *Genesis*.  
552 2002;32(2):138-41. PubMed PMID: 11857801.
- 553 42. Taniuchi I, Osato M, Egawa T, Sunshine MJ, Bae SC, Komori T, et al. Differential  
554 requirements for Runx proteins in CD4 repression and epigenetic silencing during T lymphocyte  
555 development. *Cell*. 2002;111(5):621-33. PubMed PMID: 12464175.
- 556 43. Yu K, Xu J, Liu Z, Sosic D, Shao J, Olson EN, et al. Conditional inactivation of FGF receptor 2  
557 reveals an essential role for FGF signaling in the regulation of osteoblast function and bone growth.  
558 *Development (Cambridge, England)*. 2003;130(13):3063-74. Epub 2003/05/21. PubMed PMID:  
559 12756187.
- 560 44. Srinivasan L, Sasaki Y, Calado DP, Zhang B, Paik JH, DePinho RA, et al. PI3 kinase signals  
561 BCR-dependent mature B cell survival. *Cell*. 2009;139(3):573-86. doi: 10.1016/j.cell.2009.08.041.  
562 PubMed PMID: 19879843; PubMed Central PMCID: PMC2787092.
- 563 45. Yang X, Li C, Herrera PL, Deng CX. Generation of Smad4/Dpc4 conditional knockout mice.  
564 *Genesis*. 2002;32(2):80-1. PubMed PMID: 11857783.
- 565 46. Singh SP, Wolfe A, Ng Y, DiVall SA, Buggs C, Levine JE, et al. Impaired estrogen feedback  
566 and infertility in female mice with pituitary-specific deletion of estrogen receptor alpha (ESR1). *Biology*  
567 *of reproduction*. 2009;81(3):488-96. doi: 10.1095/biolreprod.108.075259. PubMed PMID: 19439729;  
568 PubMed Central PMCID: PMC2731984.
- 569 47. Liu W, Selever J, Wang D, Lu MF, Moses KA, Schwartz RJ, et al. Bmp4 signaling is required  
570 for outflow-tract septation and branchial-arch artery remodeling. *Proceedings of the National Academy*  
571 *of Sciences of the United States of America*. 2004;101(13):4489-94. doi: 10.1073/pnas.0308466101.  
572 PubMed PMID: 15070745; PubMed Central PMCID: PMC384774.
- 573 48. Ohyama T, Groves AK. Generation of Pax2-Cre mice by modification of a Pax2 bacterial  
574 artificial chromosome. *Genesis*. 2004;38(4):195-9. PubMed PMID: 15083520.

575 49. Kim SY, Cordeiro MH, Serna VA, Ebbert K, Butler LM, Sinha S, et al. Rescue of platinum-  
576 damaged oocytes from programmed cell death through inactivation of the p53 family signaling  
577 network. *Cell Death Differ.* 2013;20(8):987-97. Epub 2013/04/20. doi: 10.1038/cdd.2013.31. PubMed  
578 PMID: 23598363; PubMed Central PMCID: PMC3705595.

579 50. Serna VA, Wu X, Qiang W, Thomas J, Blumenfeld ML, Kurita T. Cellular kinetics of *MED12*-  
580 mutant uterine leiomyoma growth and regression in vivo. *Endocr Relat Cancer.* 2018;25(7):747-59.  
581 doi: 10.1530/ERC-18-0184. PubMed PMID: 29700012.

582

583

#### 584 **Figure legends**

585 Fig 1. Expression patterns of SIX1 in developing female reproductive tract.

586 (A) Volcano plot displaying differential expressed genes in mouse PD2 uterus and vagina. Genes  
587 significantly enriched in vagina and uterus in microarray analysis [12] are marked in red and green,  
588 respectively. (B) Immunoblot analysis of SIX1 and RUNX1 expression in PD2 mouse FRT. The vagina  
589 was divided into upper and lower half. (C-E) Immunofluorescence assay for RUNX1, SIX1 (green) and  
590 TRP63 (red) in the lower FRT of PD1 (C) and PD2 (D, E) mice. Outer-wall of fornix is marker with  
591 dotted line (D). In the vaginal fornix (E), RUNX1 is down-regulated in MDE upon expression of TRP63  
592 (white arrows), whereas TRP63 and SIX1 are co-expressed (yellow arrows). Bar = 100  $\mu$ m (C and D),  
593 = 50  $\mu$ m (E).

594

595 Fig 2. SIX1 is a down-stream transcription factor of BMP4-SMAD pathway.

596 In all figures, outer-wall of fornix is shown on the right side. (A) SIX1 expression is maintained in the  
597 vaginal fornix of  $\Delta$ Np63 cKO mice (PD14) ( $n \geq 4$ ). Bar = 50  $\mu$ m. (B) SIX1 expression in MDE is  
598 SMAD4 dependent. At PD2, SIX1 is totally absent in the MDE of *Smad4* cKO mice, which normally  
599 express RUNX1 in MDE. Bar = 100  $\mu$ m. (C) Deletion of *Bmp4* in mesenchymal cells reduces SIX1 in  
600 MDE. (D) Violin plot of SIX1 immunostaining signals in the lower MDE of *Bmp4* ms-cHET and ms-

601 cKO mice (n = 3 each). The signal distributions of two groups are significantly different ( $p < 0.01$ ). Bar  
602 = 100  $\mu\text{m}$ .

603  
604 Fig 3. RUNX1 and FGFR2 modulate expression levels of SIX1 in MDE.

605 (A) Expression of RUNX1 and SIX1 in the lower FTR of PD2 *Runx1* cHET and cKO mice. RUNX1 null  
606 vaginal/cervical epithelium is outlined by dotted lines. Nuclear expression of SIX1 expression is  
607 reduced in the fornices of *Runx1* cKO mice. (B) SIX1 expression patterns in the vaginal fornices of  
608 *Runx1* cHET and cKO mice at PD2 and PD4. In the fornix of *Runx1* cKO mice, nuclear expression of  
609 SIX1 increases from PD2 to PD4, but the overall expression level of SIX1 in MDE remains low and  
610 uneven. (C) Violin plot of SIX1 IF signal distribution in the fornix of PD2 *Runx1* cHET and cKO mice (n  
611  $\geq 4$  per group). The signal distributions of two groups are significantly different ( $p < 0.01$ ). (D)  
612 Expression of SIX1 in the vaginal fornix of *Fgfr2* mutant mice. SIX1 is reduced in the fornix of *Fgfr2*  
613 cKO mice, but the SIX1 expression level is restored by expression of MAP2K1<sup>DD</sup>. (E) Violin plot of  
614 SIX1 IF signal distribution in the fornix of PD2 *Fgfr2* cHET, *Fgfr2* cKO and *Fgfr2* cKO with MAP2K1<sup>DD</sup>  
615 (cKO+MK) mice (n = 4 per group). The signal distributions are significantly different among 3 groups  
616 ( $p < 0.01$ ). (F) Regulation of SIX1 in cultured uterine explants. 20 ng/ml BMP4 has a weak effect on the  
617 expression of SIX1 in UtE. The combination of BMP4 (B), ActA (A) and FGF10 (F) (20 ng/ml each)  
618 induced nuclear expression of SIX1 and  $\Delta\text{Np63}$  in restricted regions of UtE. Replacement of FGF10  
619 with *Map2k1*<sup>DD</sup> transgene (MK) efficiently induced SIX1 and  $\Delta\text{Np63}$  in UtE. (G) Violin plot of SIX1 IF  
620 signal distribution in the UtE of cultured uterine explants (n  $\geq 4$  per group). The signal distributions are  
621 significantly different among groups ( $p < 0.01$ ). Bars = 100  $\mu\text{m}$ .

622  
623 Fig 4. SIX1 and RUNX1 collaborate in the activation of  $\Delta\text{Np63}$  locus in MDE.

624 (A) *Six1* cKO mice showed minor defects in  $\Delta\text{Np63}$  expression in the outer-wall (ow) of vaginal fornix.  
625 The  $\Delta\text{Np63}$  negative epithelial regions are indicated by arrows. (B-D) Gene-does effect of *Six1* and  
626 *Runx1* on vaginal cell fate commitment of MDE in the vaginal fornix. The outer fornix wall is on the

627 right side. (B) Expression of  $\Delta$ Np63 (red) and RUNX1 (green). (C) Proportion of MDE lined with  
628  $\Delta$ Np63-positive basal layer on the outer-wall of vaginal fornix. (D) Expression of uterine epithelial  
629 marker (PGR, green). The epithelium is highlighted with cytokeratin (red). Bars = 100  $\mu$ m.

630

631 Fig 5. Dose-dependent function of *Six1*, *Runx1* and *Smad4* in the activation of  $\Delta$ Np63 locus.

632 (A) Monoallelic loss of *Smad4* exaggerates effects of *Six1* and *Runx1* null alleles on  $\Delta$ Np63  
633 expression (green) in MDE. The outer fornix wall is shown on the right side. Breaks in the  $\Delta$ Np63-  
634 positive basal layer in the inner fornix wall are marked by arrowheads. Bar = 50  $\mu$ m. (B and C) Basal  
635 cell density (TRP63-positive nuclear area per epithelial basement membrane length) in the outer and  
636 inner fornix walls of *Six1*, *Runx1* and *Smad4* compound mutant mice. The sample number in each  
637 group is marker on the bars. The result is demonstrated by average means  $\pm$  SD. The comparisons  
638 that become significantly different by monoallelic *Smad4* loss are marked with lines, and the groups  
639 with significantly higher value are marked with asterisks. \*  $p < 0.05$ , \*\*  $p < 0.01$ .

640

641 Fig 6. DES inhibits expression of SIX1 and RUNX1 in the vaginal fornix.

642 (A-C) IF analysis for DES-effects on essential factors in the activation of  $\Delta$ Np63 locus in MDE. mes;  
643 mesenchyme. FRTs are collected from PD2 female mice with/without DES treatment (24 hours after  
644 DES-pellet injection). (A) IF assay of SIX1 and RUNX1. (B) Violin plot presentation of SIX1 IF signals  
645 in the outer and inner fornix walls of control and DES-treated PD2 mice (n=4 each). SIX1 IF signals in  
646 MDE were significantly higher (\*\*\*)  $p < 0.01$ ) in control than DES-treated mice in both outer and inner  
647 fornix walls. (C) IF assay of pSMAD1/5/9 and pMAPK1/3.

648

649 Fig 7. Epithelial ESR1 mediates DES effects on  $\Delta$ Np63 in developing vagina.

650 (A) Expression patterns of ESR1, RUNX1 and SIX1 in *Esr1* cKO mice (PD3) are indistinguishable  
651 from wild type mice. (B and C) Effect of DES on the FRT of *Esr1* cHET and cKO mice (PD3): (B) IF  
652 assay of ESR1 (green) and TRP63 (red), (C) IF assay of RUNX1 and pMAPK1/3. (D) Effect of DES

653 on the expression of SIX1 (green) and TRP63 (red) in the fornix of *Map2k1<sup>DD</sup>* conditional transgenic  
654 mice (PD3). The outer-wall (ow) of fornix is marked with dotted lines. Bars = 100  $\mu$ m.

655

656

657 Fig 8. Model of vaginal epithelial cell fate commitment in MDE. Signals of vaginal mesenchymal  
658 factors are transduced to down-stream transcription factors, and the transcription factors dose-  
659 dependently activate enhancers of  $\Delta$ Np63 in MDE. Upon differentiation of VgE,  $\Delta$ Np63 itself maintains  
660 the transcriptional activity of  $\Delta$ Np63 locus in VgE fate in dependent of vaginal mesenchymal factors.  
661 DES-ESR1 activity within MDE causes vaginal adenosis by blocking the vaginal cell fate commitment  
662 of MDE interfering the signal transduction. Meanwhile, DES-ESR1 activity in vaginal mesenchymal  
663 cells promote activation of  $\Delta$ Np63 locus in MDE through paracrine mechanisms.

664

665 **Supporting information captions**

666 S1 Fig. (A-C) ECR browser view of *Homo sapiens TRP63*. (D) Contrav 3 analysis. Conserved  
667 SMADs:RUNX1 binding sites in the coding region in  $\Delta$ Np63 exon 1. A boxed region with a colored line  
668 in each panel is enlarged in the next panel. (E) The sequence is deleted in the  $\Delta$ Np63-Cre KI mouse  
669 genome.

670

671 S2 Fig. Structure of  $\Delta$ Np63-iCre-IRES-EGFP transgene. (A) Contra V3 analysis of the putative 5'  
672 proximal enhancer (based sequence: mm10 chr16:25801055-25802045). (B) Vector maps of the  
673  $\Delta$ Np63-iCre-IRES-EGFP transgene (linearized and circular form). (C) Distribution of cells expressed  
674  $\Delta$ Np63-Cre in the lower FRT of PD21 mice. mEGFP reporter (brown) is detected by IHC.

675

676 S3 Fig. Model: Effect of DES exposure on the signaling pathways in developing vagina.

677

**Figure 1**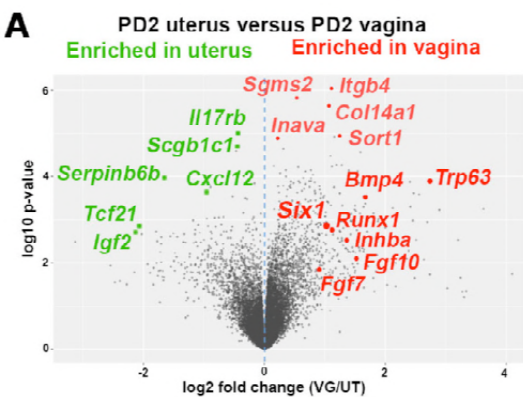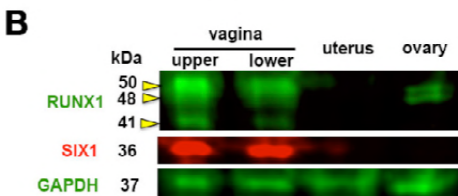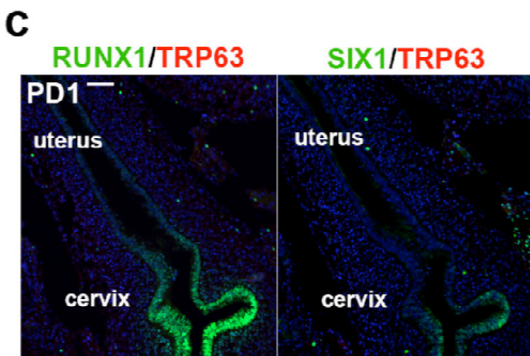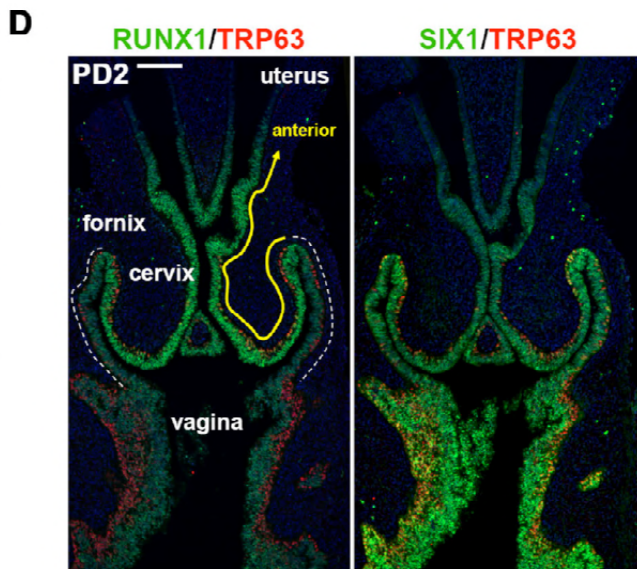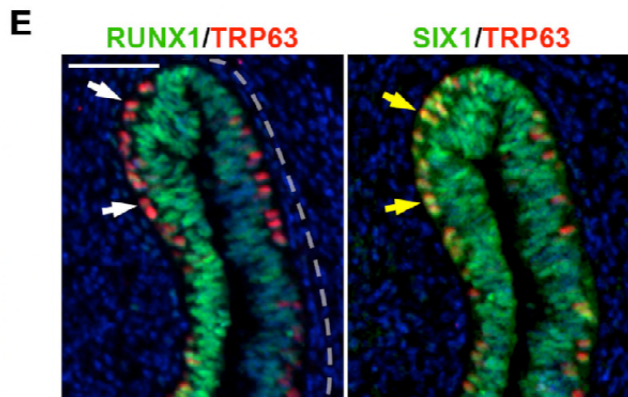

**Figure 2**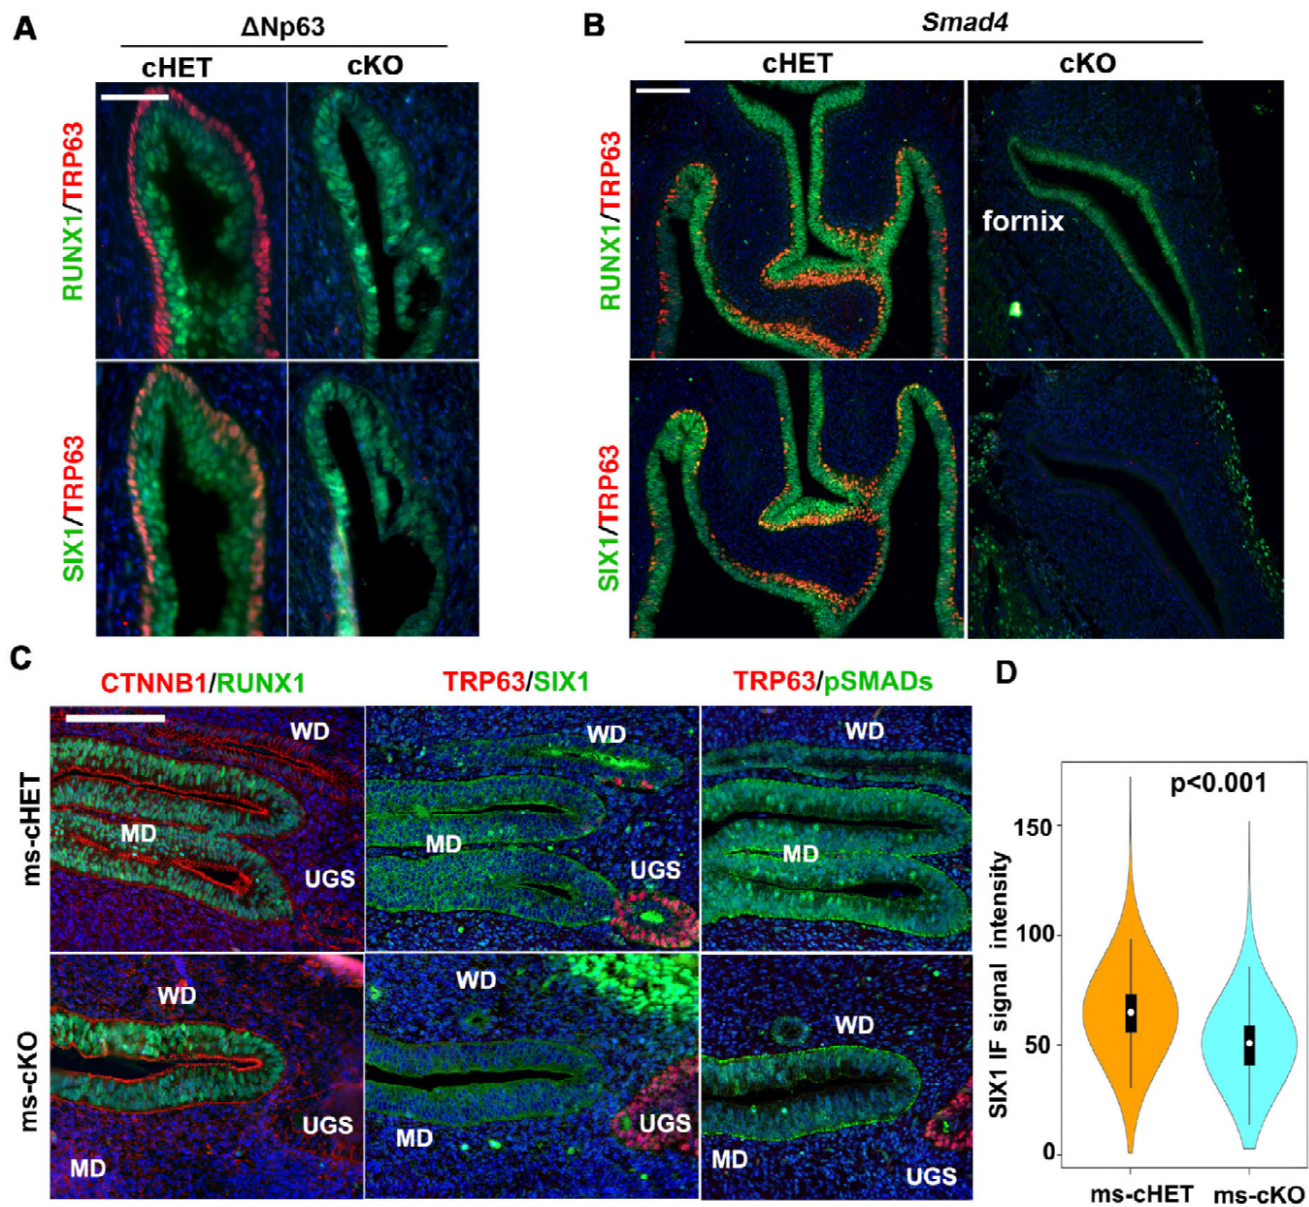



**Figure 3**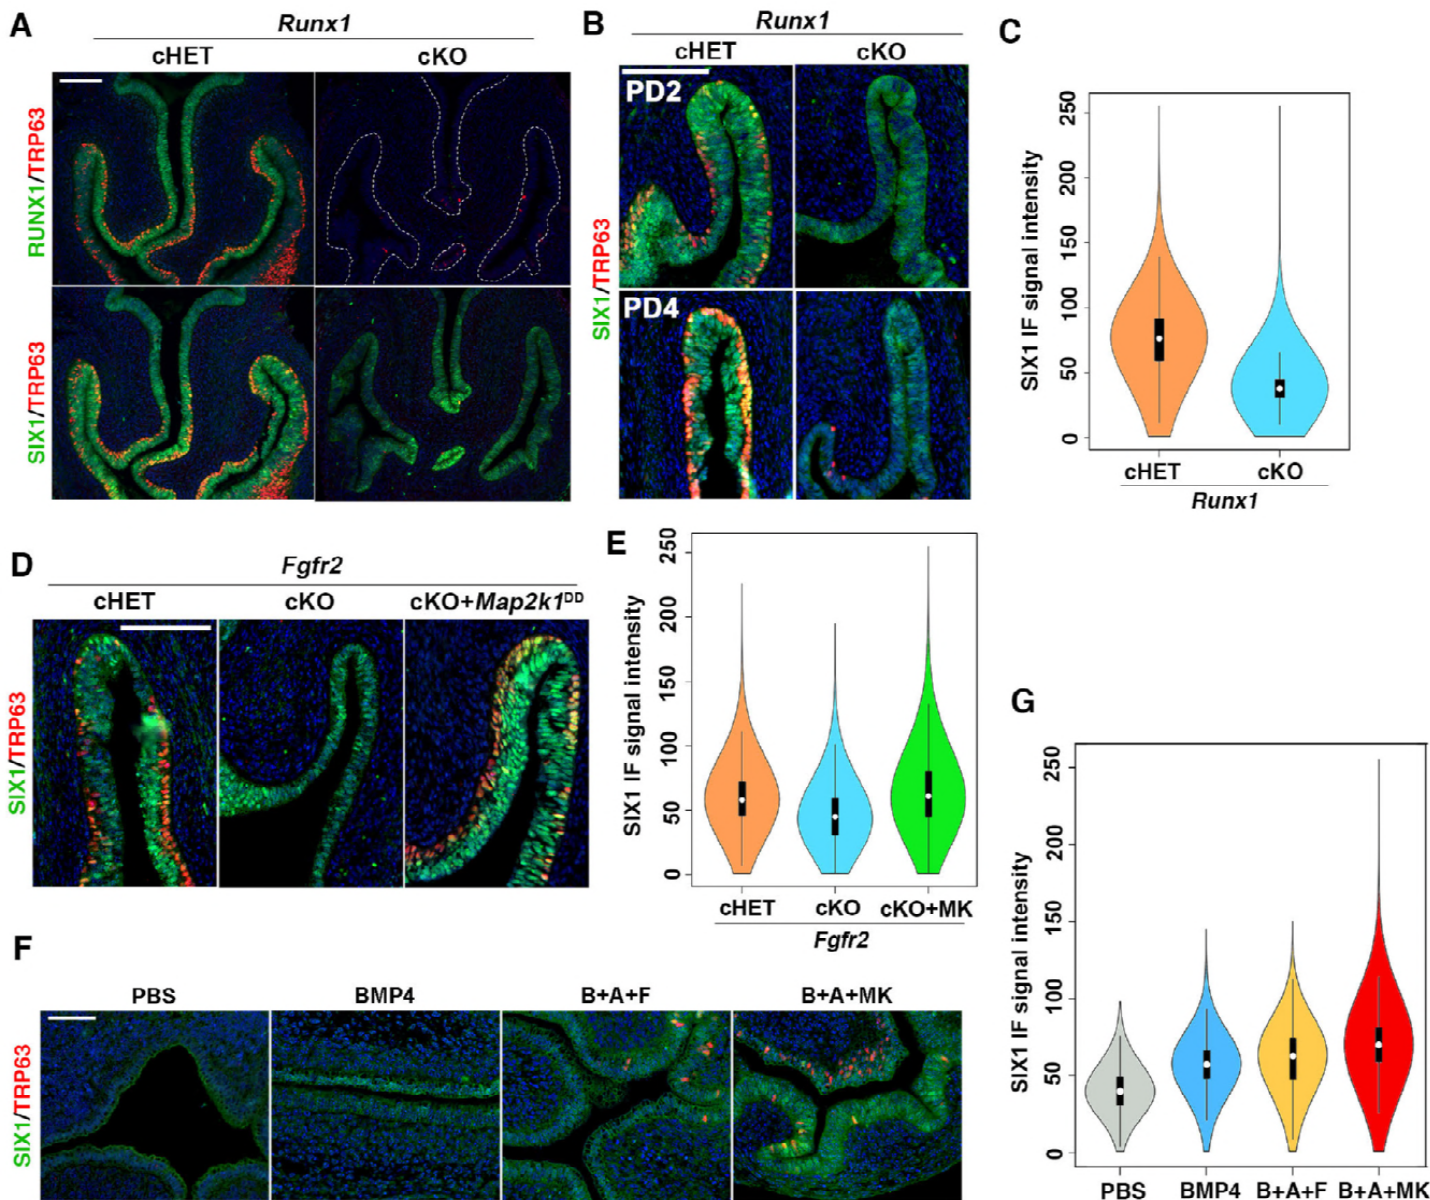

**Figure 4**

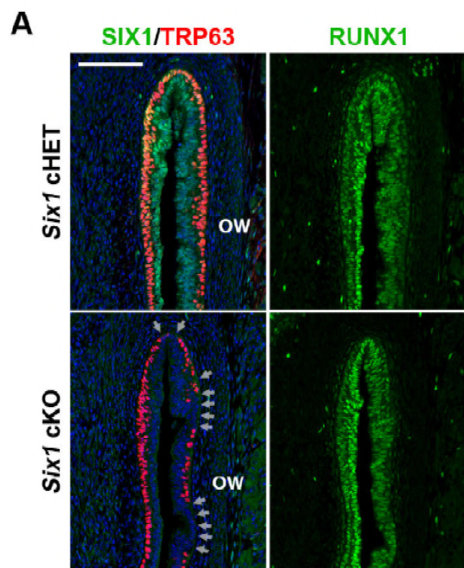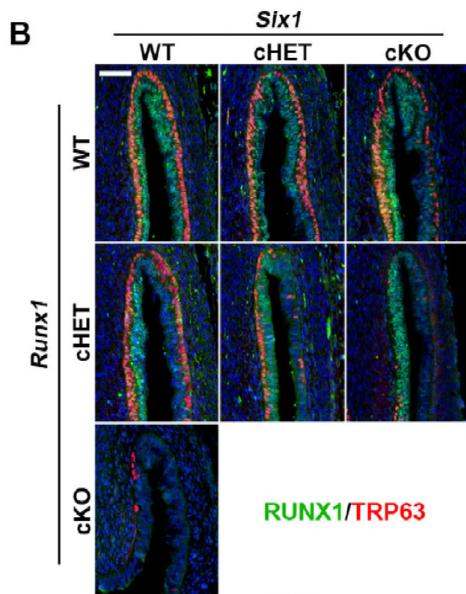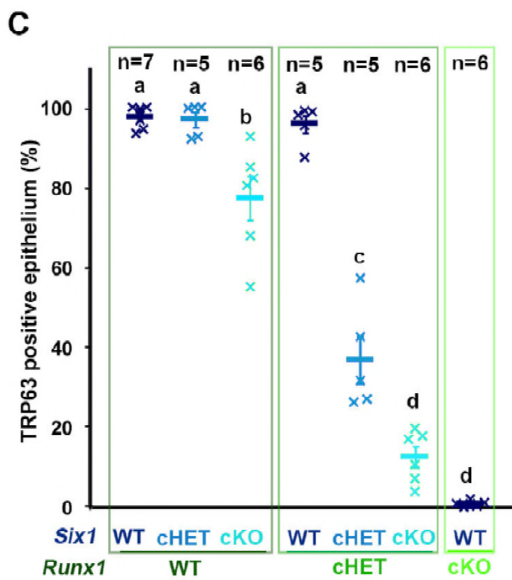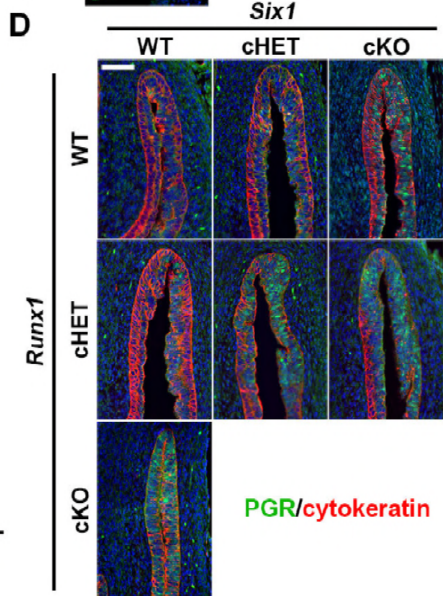

**Figure 5**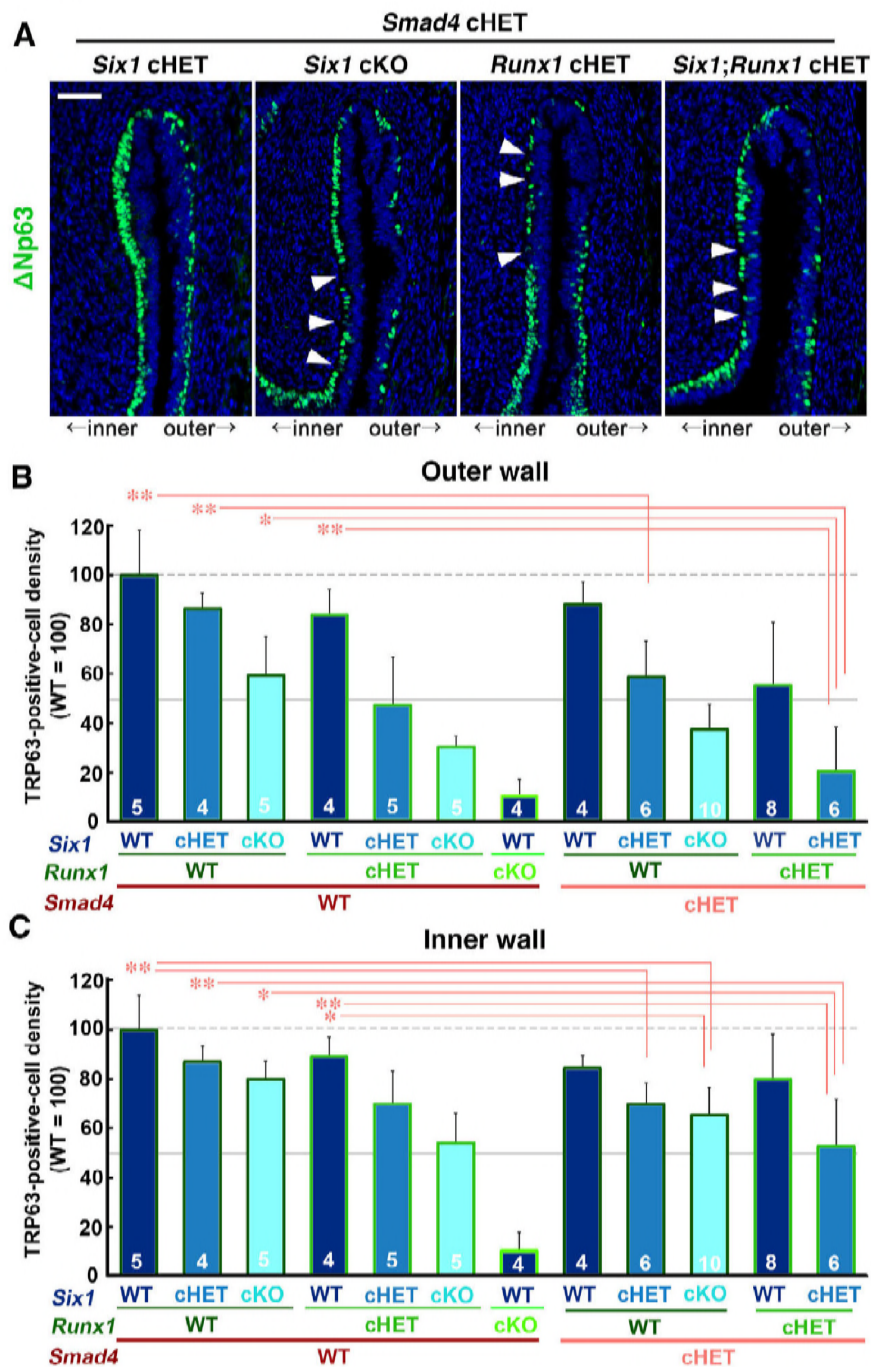

Figure 6

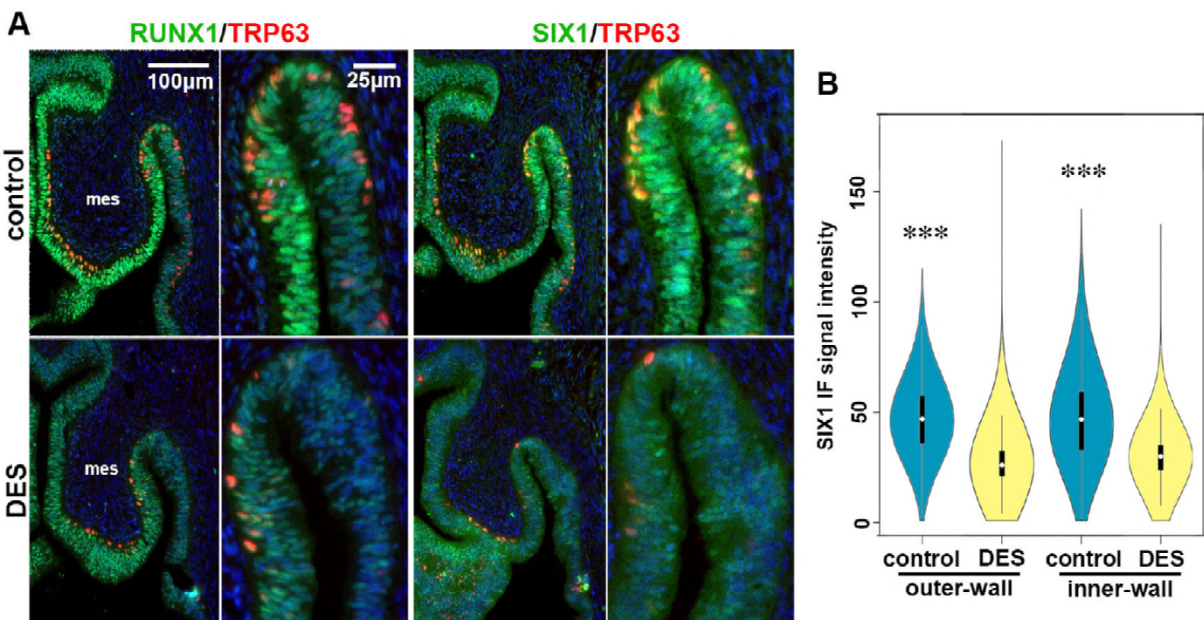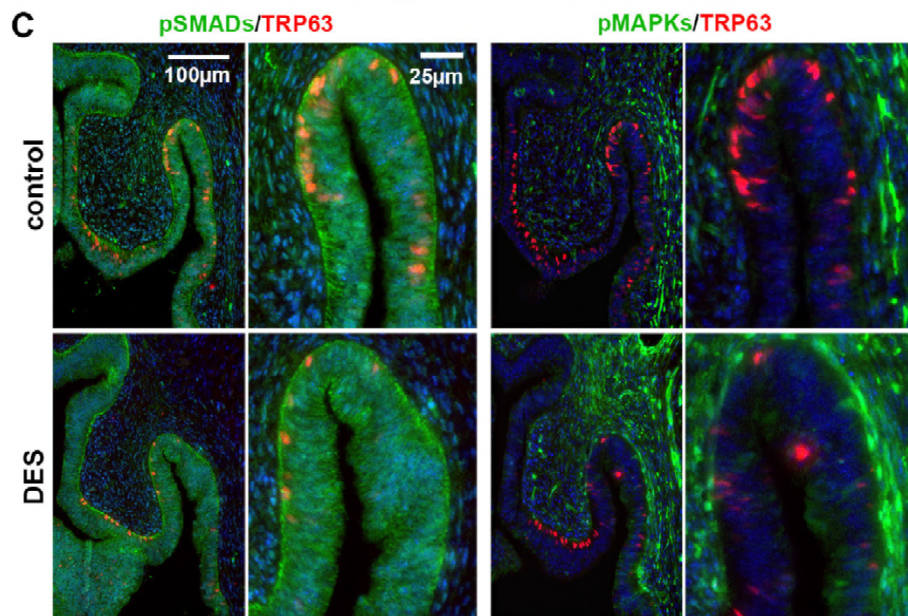

Figure 7

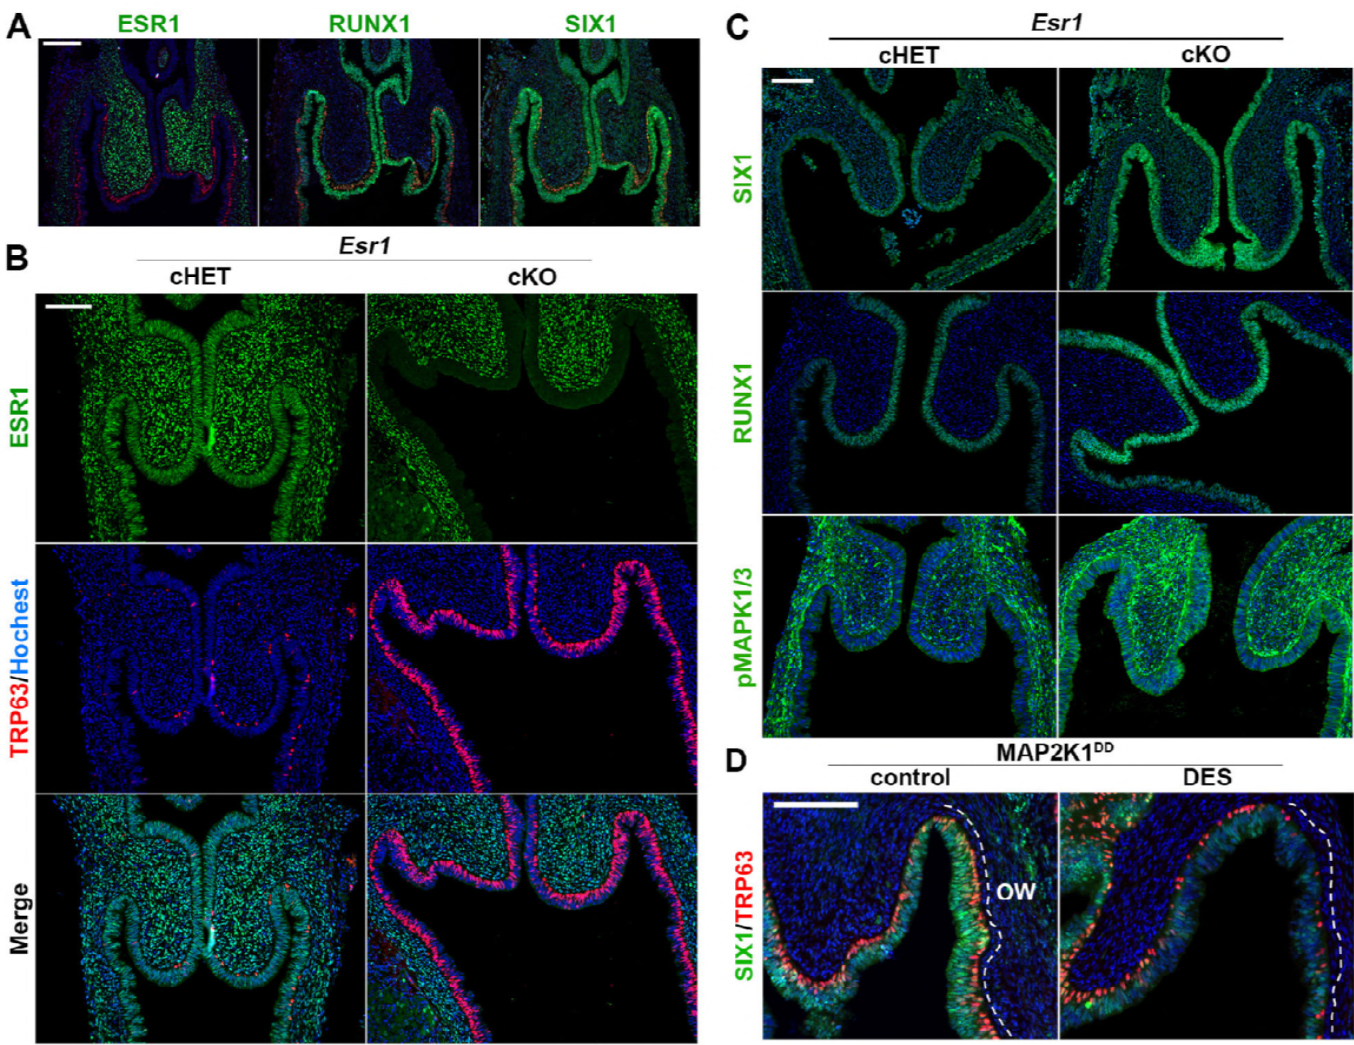

Figure 8

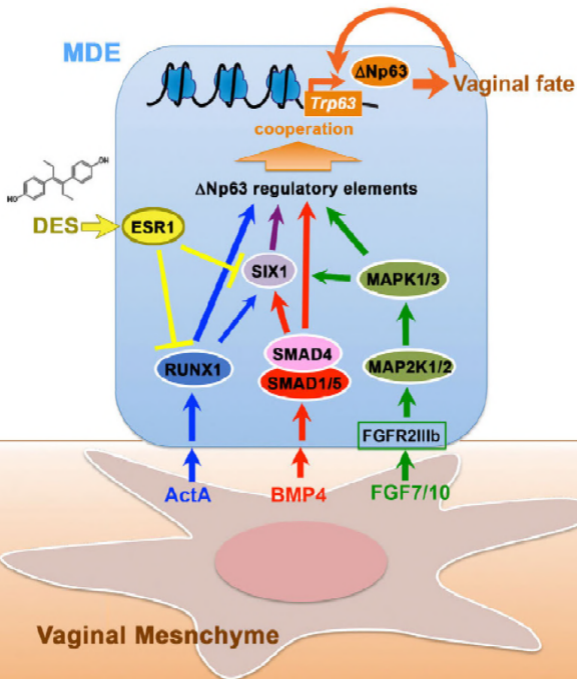

# S1 Figure

## A ECR browser on Human (hg19) TP63 locus

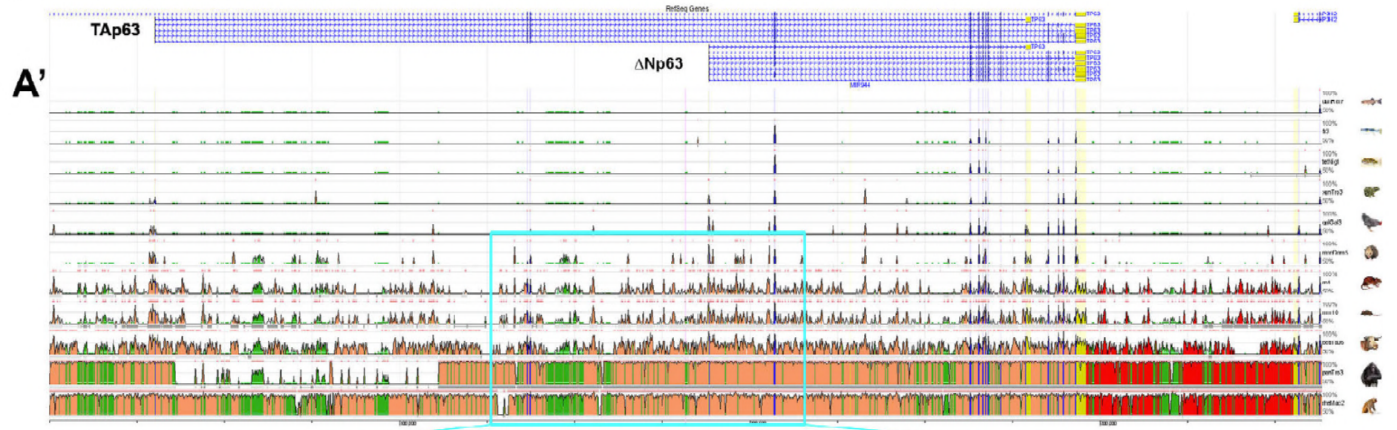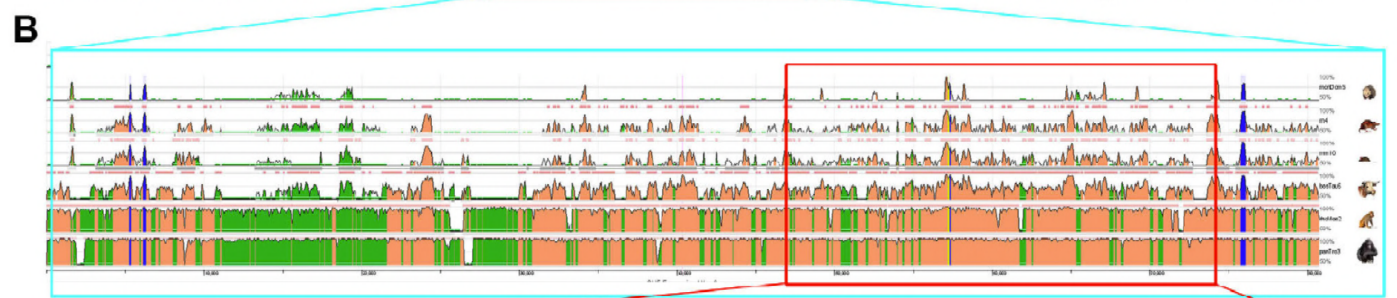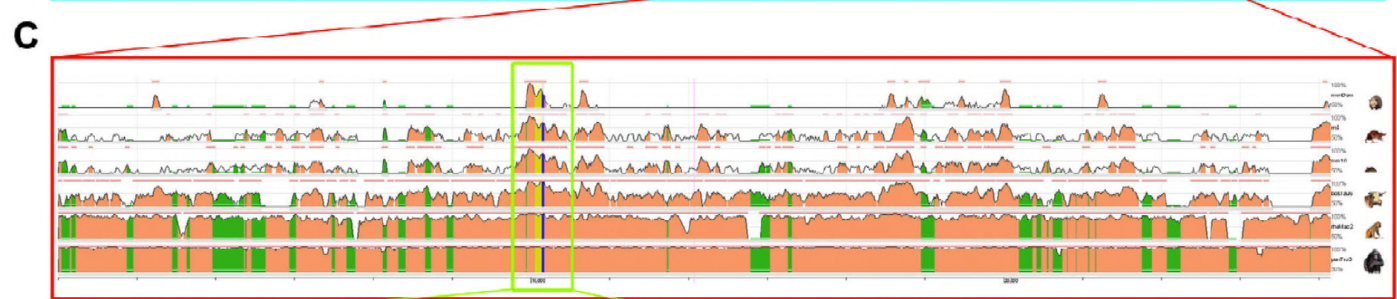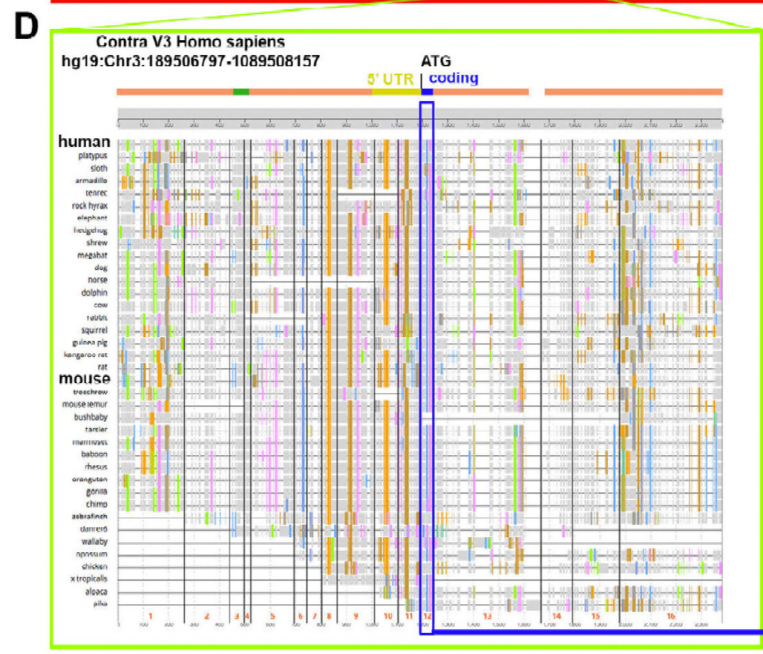

- SMAD4: TRANSFAC20113, M00733
- SMAD4: TRANSFAC20113, M01089
- SMAD4: Homo sapiens, M466\_1.02
- SIX1: TRANSFAC20113, M01313
- SIX1: Homo sapiens, M1049\_1.02
- RUNX1: JASPAR, MA0002.2
- RUNX1: Homo sapiens, MA6457\_1.02

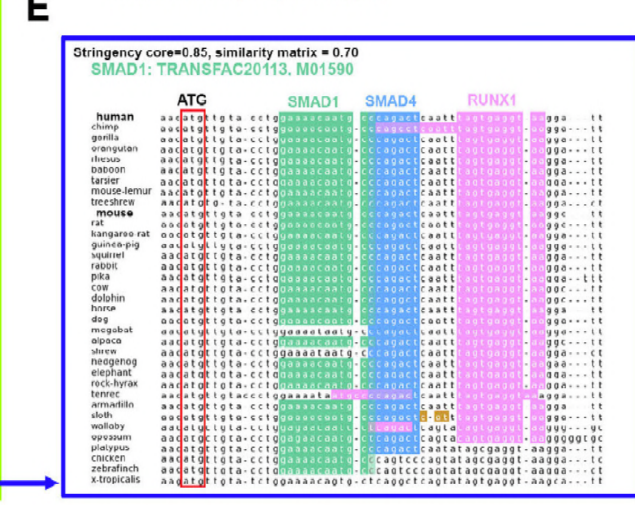

# S2 Fig

## A

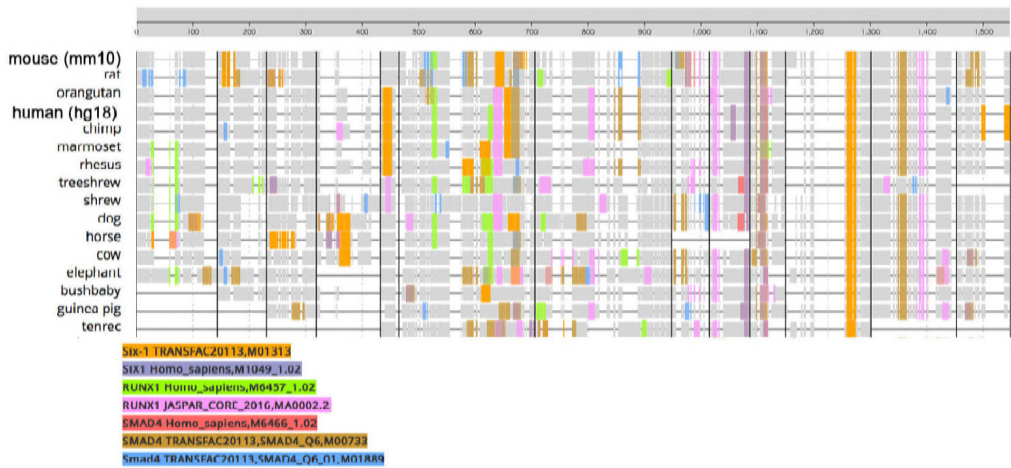

## B

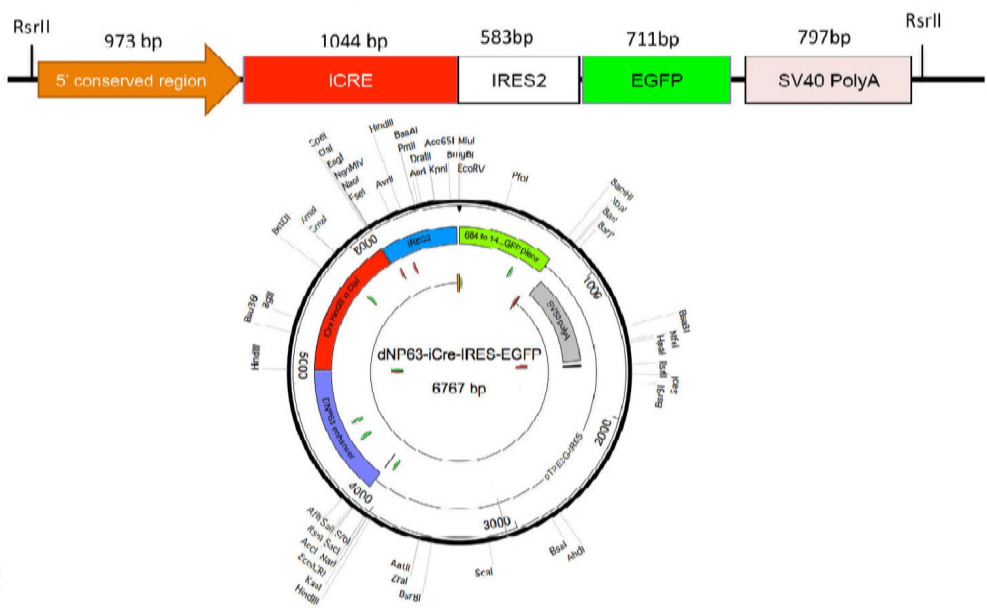

## C

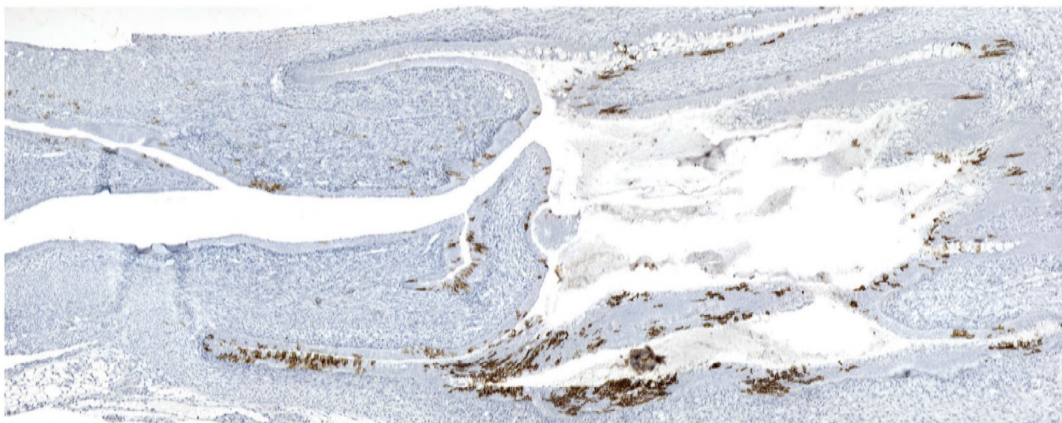



## A. Normal

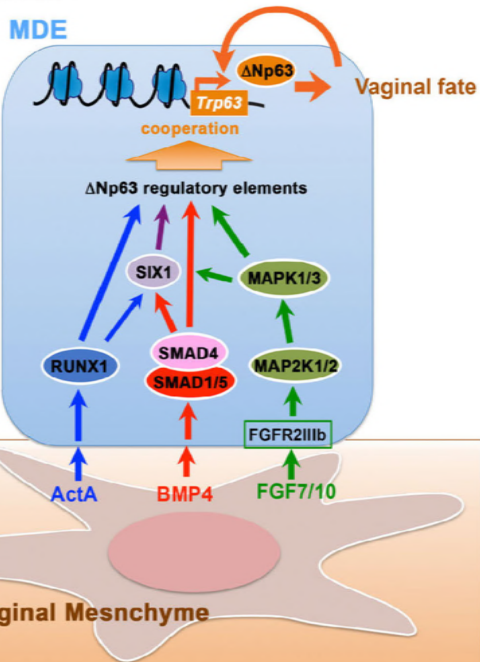

## B. DES exposed

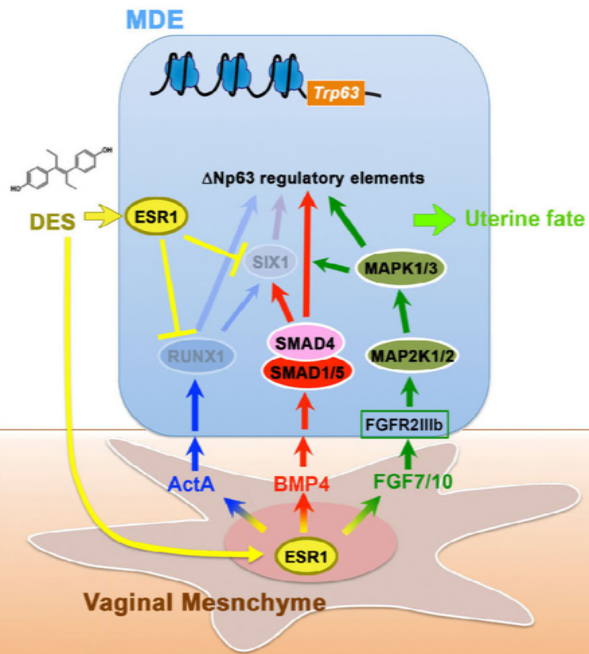

Source: https://www.biorxiv.org/content/10.1101/427351v1.full.pdf
